# Supplementary material for: Examining the safety of menstrual cups among rural primary school girls in western Kenya: observational studies nested in a randomised controlled feasibility study
Source: PubMed Central journal article supplement (PMC5566618; doi:10.1136/bmjopen-2016-015429), 2017-05-04
Supplement: bmjopen-2016-015429.draft_revisions.pdf [file bmjopen-2016-015429.draft_revisions.pdf]

# BMJ Open

## Examining the safety of menstrual cups among rural primary school girls in western Kenya: observational studies nested in a randomized controlled feasibility study

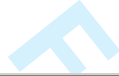

|                                 |                                                                                                                                                                                                                                                                                                                                                                                                                                                                                                                                                                                                                                                                                                                                                                                                                                                                                                                                                                    |
|---------------------------------|--------------------------------------------------------------------------------------------------------------------------------------------------------------------------------------------------------------------------------------------------------------------------------------------------------------------------------------------------------------------------------------------------------------------------------------------------------------------------------------------------------------------------------------------------------------------------------------------------------------------------------------------------------------------------------------------------------------------------------------------------------------------------------------------------------------------------------------------------------------------------------------------------------------------------------------------------------------------|
| Journal:                        | <i>BMJ Open</i>                                                                                                                                                                                                                                                                                                                                                                                                                                                                                                                                                                                                                                                                                                                                                                                                                                                                                                                                                    |
| Manuscript ID                   | bmjopen-2016-015429                                                                                                                                                                                                                                                                                                                                                                                                                                                                                                                                                                                                                                                                                                                                                                                                                                                                                                                                                |
| Article Type:                   | Research                                                                                                                                                                                                                                                                                                                                                                                                                                                                                                                                                                                                                                                                                                                                                                                                                                                                                                                                                           |
| Date Submitted by the Author:   | 03-Dec-2016                                                                                                                                                                                                                                                                                                                                                                                                                                                                                                                                                                                                                                                                                                                                                                                                                                                                                                                                                        |
| Complete List of Authors:       | Juma, Jane; Kenya Medical Research Institute, Center for Global Health<br>Nyothach, Elizabeth; Kenya Medical Research Institute, Center for Global Health<br>Laserson, Kayla; Centers for Disease Control and Prevention<br>Oduor, Clifford; Kenya Medical Research Institute, Center for Global Health<br>Arita, Lilian; Kenya Medical Research Institute, Center for Global Health<br>Ouma, Caroline; Kenya Medical Research Institute, Center for Global Health<br>Oruko, Kelvin; Kenya Medical Research Institute, Center for Global Health<br>Omoto, Jackton; Ministry of Health, Siaya District Hospital<br>Mason, Linda; Liverpool School of Tropical Medicine<br>Alexander, Kelly; Liverpool School of Tropical Medicine<br>Fields, Barry; Centers for Disease Control and Prevention<br>Onyango, Clayton; Centers for Disease Control and Prevention<br>Phillips-Howard, Penelope; Liverpool School of Tropical Medicine, Department of Clinical Sciences |
| <b>Primary Subject Heading</b>: | Public health                                                                                                                                                                                                                                                                                                                                                                                                                                                                                                                                                                                                                                                                                                                                                                                                                                                                                                                                                      |
| Secondary Subject Heading:      | Obstetrics and gynaecology                                                                                                                                                                                                                                                                                                                                                                                                                                                                                                                                                                                                                                                                                                                                                                                                                                                                                                                                         |
| Keywords:                       | menstrual hygiene management, menstrual cups, toxic shock syndrome, Escherichia coli, Kenya, adolescent girls                                                                                                                                                                                                                                                                                                                                                                                                                                                                                                                                                                                                                                                                                                                                                                                                                                                      |
|                                 |                                                                                                                                                                                                                                                                                                                                                                                                                                                                                                                                                                                                                                                                                                                                                                                                                                                                                                                                                                    |

SCHOLARONE™  
Manuscripts

1  
2  
3 **Examining the safety of menstrual cups among rural primary school girls in western Kenya:**  
4  
5 **observational studies nested in a randomized controlled feasibility study**  
6  
7  
8  
9

10 **Short title:** Safety of menstrual cups among Kenyan schoolgirls

11  
12 Jane Juma MSc <sup>1</sup>, Elizabeth Nyothach MA <sup>1</sup>, Kayla F. Laserson ScD <sup>1,2</sup>, Clifford Oduor BSc <sup>1</sup>, Lillian Arita Bsc  
13  
14 <sup>1</sup>, Caroline Ouma BSc <sup>1</sup>, Kelvin Oruko BSc <sup>1</sup>, Jackton Omoto MD MMed Obs & Gyn <sup>3</sup>, Linda Mason PhD <sup>4</sup>,  
15  
16 Kelly Alexander MPH <sup>4</sup>, Barry Fields PhD <sup>5</sup>, Clayton O. Onyango PhD <sup>5</sup>, Penelope A. Phillips-Howard PhD  
17  
18  
19 <sup>1,4</sup>

- 20  
21  
22 1. Center for Global Health Research, Kenya Medical Research Institute (KEMRI), Kisumu, Kenya  
23  
24 ([JJuma@kemricdc.org](mailto:JJuma@kemricdc.org), [ENyothach@kemricdc.org](mailto:ENyothach@kemricdc.org), [oduor.clifford@gmail.com](mailto:oduor.clifford@gmail.com);  
25  
26 [LArita@kemricdc.org](mailto:LArita@kemricdc.org), [COuma@kemricdc.org](mailto:COuma@kemricdc.org), [kelvinoov@gmail.com](mailto:kelvinoov@gmail.com))  
27  
28  
29 2. Division of Global Health Protection, Center for Global Health, Centers for Disease Control and  
30  
31 Prevention, Atlanta USA ([kel4@cdc.gov](mailto:kel4@cdc.gov))  
32  
33 3. Department of Obstetrics and Gynecology, Siaya District Hospital, Ministry of Health, Siaya,  
34  
35 Kenya. ([Omotojackton@yahoo.com](mailto:Omotojackton@yahoo.com))  
36  
37  
38 4. Department of Clinical Studies, Liverpool School of Tropical Medicine, Liverpool, UK  
39  
40 ([Penelope.Phillips-Howard@lstm.ac.uk](mailto:Penelope.Phillips-Howard@lstm.ac.uk), [Linda.Mason@liverpool.ac.uk](mailto:Linda.Mason@liverpool.ac.uk), [kellytesh@gmail.com](mailto:kellytesh@gmail.com))  
41  
42  
43 5. Centers for Disease Control and Prevention (CDC)-Kenya, Kisumu, Kenya ([bsf2@cdc.gov](mailto:bsf2@cdc.gov),  
44  
45 [xwl4@cdc.gov](mailto:xwl4@cdc.gov))  
46

47 **Corresponding author**

48  
49 Dr Penelope Phillips-Howard, Department of Clinical Sciences, Liverpool School of Tropical Medicine,  
50  
51 Pembroke Place, Liverpool, L5 3QA, UK; tel: +44 7985431005 (UK), +254 702126188 (Kenya); email:  
52  
53 [Penelope.Phillips-Howard@lstm.ac.uk](mailto:Penelope.Phillips-Howard@lstm.ac.uk)  
54  
55  
56  
57  
58  
59  
60

1  
2  
3 **Keywords** menstrual hygiene management, menstrual cups, hygiene, *Staphylococcus aureus*, toxic shock  
4  
5 syndrome, *Escherichia coli*, Kenya  
6  
7  
8  
9

10 **Word count: 3410**  
11  
12  
13

## 14 **Abstract**

15  
16  
17 Objective: Examine the safety of menstrual cups against sanitary pads and usual practice in Kenyan  
18  
19 schoolgirls.  
20

21  
22 Design: Observational studies nested in a cluster randomized controlled feasibility study  
23

24 Setting: 30 primary schools in a health and demographic surveillance system (HDSS) in rural western  
25  
26 Kenya.  
27

28  
29 Participants: Menstruating primary schoolgirls 14 -16 years(y) participating in a menstrual feasibility st  
30

31 Interventions: Insertable menstrual cup, monthly sanitary pads, or 'usual practice' (controls).  
32

33 Outcome measures: *S aureus* vaginal colonization, *E coli* growth on sampled used cups, toxic shock  
34  
35 syndrome or other adverse health outcomes.  
36

37  
38 Results: No adverse event or TSS was detected among participants. *S aureus* prevalence in 604 eligible  
39  
40 girls tested was 10.8%, with no significant difference over intervention time or between groups. Of 65 *S*  
41  
42 *aureus* positives at first test, 49 girls were retested and 10 (20.4%) remained positive. Of these, 2(20%)  
43  
44 sample isolates tested positive for TSST-1; both were girls provided pads and were clinically healthy.  
45  
46 Nine percent of cups required replacements for loss, damage, dropping in latrine or a poor fit. Of 30  
47  
48 used cups processed for *E coli* growth, 13 (37.1%, 95% CI 21.1%-53.1%) had growth. *E coli* growth was  
49  
50 greatest in newer compared with established users (53% vs 22.2%, p=0.12).  
51  
52  
53  
54  
55  
56  
57  
58  
59  
60

1  
2  
3 Conclusions: Among this feasibility sample, no evidence emerged to indicate menstrual cups are  
4 hazardous or cause health harms among rural Kenyan schoolgirls but large-scale trials and post-  
5 marketing surveillance should continue to evaluate cup safety.  
6  
7  
8  
9

10  
11  
12 **Strengths and limitations of the study:**  
13

- 14  
15 1. In the small sample of girls followed, there was no evidence of health harms use.  
16  
17 2. Evaluation of the safety of menstrual products, including laboratory investigations, was feasible  
18 among adolescent schoolgirls in a LMIC setting.  
19  
20 3. Logistical limitations prevented 'before' and 'after' prevalence surveys.  
21  
22 4. To minimize possible health risks, girls were trained on how to use and clean menstrual cups, and  
23 girls in all arms were provided soap for handwashing, with follow-up by nurses, creating improved  
24 hygiene circumstances for cup use in this LMIC setting.  
25  
26  
27  
28  
29  
30  
31  
32  
33  
34  
35  
36  
37  
38  
39  
40  
41  
42  
43  
44  
45  
46  
47  
48  
49  
50  
51  
52  
53  
54  
55  
56  
57  
58  
59  
60

## Introduction

The inadequate management of adolescent girls' menstruation in low and middle-income countries (LMIC) has recently emerged as an important priority for international action (1-6). Due to logistical and cost barriers, these females may manage menstruation with non-absorbent, unhygienic and uncomfortable materials (7-11). Studies in southern Asia and Africa report such items are associated with genital infections although these are seldom clinically verified (12-17), preventing understanding of women's needs to minimize such risks (3, 7-9, 13, 18). Meanwhile a growing body of pilot studies have embarked on testing the value of menstrual hygiene products such as sanitary pads (19-21), and menstrual cups (22-27), for girls and women in resource-poor settings.

While studies in high income countries have found no association between the frequency of reproductive tract and urogenital infections among menstrual cup users (28-33), research on the safety of menstrual cups among girls (22, 24, 26) and women (23, 25) in LMIC have relied on self-reported information with no clinical or laboratory confirmatory studies. There is concern an insertable menstrual item may increase the risk of infections, particularly *Staphylococcus aureus*, leading to menstrual toxic shock syndrome (mTSS) (34). Menstrual cups are different from highly absorbent tampons; they collect blood, and do not absorb or disrupt the vaginal epithelium (32, 33, 35-37). However, concern remains about any vaginal intrusion (34, 38, 39), particularly among girls (40), with poor water, hygiene and sanitation (WASH) facilities (41). Further laboratory and field-based studies are thus needed to clarify risks associated with menstrual products, to better define the cost-benefit of subsidized provision for girls in LMIC. This paper describes the exploration of cup safety during a randomized controlled pilot feasibility study among adolescent schoolgirls in rural Kenya (42).

## METHODS

### Study site and population

The study site is within the health and demographic surveillance system (HDSS) of the Kenya Medical Research Institute (KEMRI) and CDC research station in Siaya County, a rural district in the former Nyanza Province, in western Kenya (43). The population of the HDSS site approximates 230,000 individuals in a ~700km<sup>2</sup> area, with adolescent girls aged 15-19 years comprising ~11% of the female population (43). The area is served by one district hospital providing tertiary care, and 10 local health clinics within the HDSS area. A second district hospital is sited in Kisumu, 40km from the study site. The KEMRI and CDC collaborative research station has on site laboratories certified for clinical trials and quality control procedures.

### Menstrual solutions (Ms) study

The Ms Study was a cluster randomized controlled 3-arm 'proof of concept' feasibility study conducted between September 2012 and November 2013 in Gem, a sub-area within the HDSS.(42) Of 71 primary schools in Gem, 62 agreed to participate in a baseline water sanitation and hygiene (WASH) assessment. Of these, 30 reached the pre-defined WASH threshold (presence of water in school on the day of WASH visit, availability of separate latrine bank for girls, and a pupil-latrine ratio of 70:1 or less) described in detail elsewhere (41). Girls were eligible if they were aged 14-16y, had experienced 3 menses, were resident in the HDSS for at least 4 months, and attended a study school (42). A sample of 185 girls/arm from the total population of 3,165 girls was estimated to offer 5% precision for the primary outcome, school dropout) if this occurred in 15% of the control arm (42). Recruitment of 250 girls (10 schools, average of 25 girls per school) was scheduled to allow for a design effect of 1.25 and 7.5% loss to follow-up.

## Menstrual products and hygiene

Girls in the menstrual cup group were provided with one menstrual cup (Mooncup®), size B for nulliparous women, or size A for those who had given birth (figure 1). This brand was selected because it has been tested internationally (31, 44), was registered by the US Food and Drug Administration, and by the Kenyan Pharmacy and Poisons Board for pilot testing among schoolgirls in Nairobi (24). Cups are made of high grade medical silicone with material continuous without edges (30). When inserted into the vagina it collects ~30 ml of menstrual blood, lasting 4-8 hours before emptying is required, according to manufacturer. Girls in the cup group were given instruction on how to insert, remove and clean the cup. Girls in the sanitary pad arm were each given 2 packs (total 16 pads) monthly of *A/ways*®, a brand available in Kenya. Girls in the usual practice group continued using traditional materials such as cloths, bedding or paper (3, 27) or sanitary pads. All participating girls, regardless of study arm, received a lesson on menstrual hygiene by study nurses, including hand-washing and how to wipe after defecation, and provision of bar soap for hand hygiene throughout the study. Schools separately received soap detergent to support pupils' hand-washing in school.

## Safety monitoring

Safety monitoring components comprised routine nurse-based screening and population-based monitoring (figure 2), and clinical evaluation of infection with laboratory confirmation.

### *Nurse screening and population based monitoring*

Following a meeting with the girls and parents, each family was provided with information leaflets which included signs and symptoms of mTSS, where they could seek emergency care, and contact information.

Possible mTSS was monitored through school and community pathways. Study nurses screened each

1  
2  
3 participant routinely twice per term, asking girls about comfort of the product, use, and any health  
4  
5 concerns including questioning of mTSS signs and symptoms. This was supplemented by nurse visits to  
6  
7 their designated target schools 1-2 times a week, allowing examination of any participant complaining of  
8  
9 any signs or symptoms that could be mTSS or another infection or harm. A focal point teacher  
10  
11 designated by girls in each school was provided credit for her phone to communicate with nurses  
12  
13 between visits, if necessary. Field staff were informed of all girls participating in the study who resided in  
14  
15 their designated village. All participants and their families were provided contact details of the field staff  
16  
17 in their village, in case they wished to contact them in the event of a febrile episode or any other  
18  
19 symptoms that could have been mTSS. The field staff were provided contact information for the study  
20  
21 nurses and research team, and could support immediate evacuation to tertiary care facilities if required.  
22  
23  
24  
25  
26  
27

28 The hospitals and health facilities in the study area were provided with leaflets on clinical signs and  
29  
30 symptoms of mTSS. Consultant obstetrician and gynecologists in tertiary care facilities were involved  
31  
32 with the study, and were prepared to accept any mTSS referral cases over the study duration. At the end  
33  
34 of the study, nurses visited all health facilities in the study area to recheck registry records as a  
35  
36 precaution against any case missed by our monitoring procedures. The study data manager reviewed  
37  
38 the HDSS database for deaths of any study participants on a monthly basis, and completed a summary  
39  
40 check at study end to enumerate and confirm if any deaths had occurred or been missed from the  
41  
42 monthly surveillance checks.  
43  
44  
45  
46  
47  
48

#### 49 *Vaginal swabbing to evaluate the prevalence of S aureus*

50  
51 Assenting girls in all groups were invited to have a vaginal swab taken to examine the prevalence of S  
52  
53 *aureus* colonization between January and September 2013. After piloting the procedure, each nurse  
54  
55 facilitated the *S aureus* study in her schools, training the girls on the self-swabbing procedure (45). This  
56  
57  
58  
59  
60



1  
2  
3 activity involved taking a vaginal swab (approximately 3 to 4 inches into the vagina) in the school  
4 bathroom or private room. Swabs were not taken during menstruation (34, 45-47). The girl gave the  
5 vaginal swab to the nurse who checked it was moist/discolored before placing it in a vial containing  
6 Amies transport medium with agar (Becton Dickinson Microbiology Systems). Each swab was labeled  
7 individually with the girls' unique study code. Vaginal swabs that had been placed in transport medium  
8 were placed in a cool box, packed with frozen ice packs, and shipped to the KEMRI laboratories for  
9 isolation and phenotypic identification of *S aureus* and TSST-1 production.  
10  
11  
12  
13  
14  
15  
16  
17  
18  
19

#### 20 21 22 *Swab analysis for S aureus*

23  
24 Laboratory staff were masked to girls' allocated menstrual product. Each vaginal swab was processed as  
25 per protocol (32, 34). Swabs were streaked for isolation onto a mannitol salt agar plate and on tryptic  
26 soy agar with 5% sheep blood. All plates were incubated at between 36°C-37°C for 24 hours in air. After  
27 incubation, colony types were visualized for characteristic morphology of *S aureus*. Colonies were  
28 enumerated, isolated on plates containing tryptic soy agar and incubated for 24 hours at between 36°C-  
29 37 °C. Gram staining, a catalase test, and a slide and tube coagulase test were performed to  
30 phenotypically identify *S aureus*.  
31  
32  
33  
34  
35  
36  
37  
38  
39  
40  
41

#### 42 43 *Detection of TSST-1 among S aureus positive girls*

44  
45 This required a second (repeat) positive swab taken from girls found positive in the main prevalence  
46 survey. Repeat swabs from *S aureus* positive girls were processed as above, examined again for  
47 presence of *S aureus*. After positive identification as *S aureus* via culture (required for TSST-1 testing),  
48 isolates were placed in sterile (16- by 150-mm) glass tubes containing 5 ml of brain heart infusion broth  
49 (Becton Dickinson), and tubes were mixed end over end for 18-24 h at 36°C- 37°C in a shaking incubator.  
50  
51  
52  
53  
54  
55  
56  
57  
58  
59  
60

1  
2  
3 micro centrifuge tubes. The Toxic Shock Test- Reverse Passive latex Antigen (TST-RPLA) agglutination  
4  
5 test for the detection of TSST-1 in the culture fluid supernatant of the cultured *S aureus* was tested using  
6  
7 the staphylococcal test kit (TD0940A).  
8  
9

### 10 11 12 *Menstrual cup screening for E.coli contamination*

13  
14 Data from all girls receiving cups were assessed and 1:4 cups were randomly selected stratified by  
15  
16 duration of provision, excluding girls who had received a replacement. Randomly selected participants  
17  
18 were traced and asked if they were willing to swap their existing cup for a new one, to allow laboratory  
19  
20 examination of their cup. Each used cup was placed in a separate lock-bag which was labeled with girls'  
21  
22 study code, and transported to the laboratory and tested for *E coli* growth. Each cup was swabbed using  
23  
24 polyester tipped swab moistened in normal saline and inoculated into both MacConkey (MAC) agar and  
25  
26 onto blood agar (BA) and incubated for 18-24 h at 37°C. After incubation, colony types were visualized  
27  
28 for characteristic morphology of *E.coli* from the MAC plates, and subjected to indole testing. The  
29  
30 colonies generated which were indole positive were classified using standard terminology as suspected  
31  
32 *E coli* (48). Laboratory outcomes were analyzed by study arm, into proportion positive, with 95%  
33  
34 confidence limits.  
35  
36  
37  
38  
39  
40  
41

## 42 **RESULTS**

### 43 44 45 46 *Morbidity and mortality surveillance*

47  
48 No symptoms of mTSS were identified during nurse screening or reported through village recorders. No  
49  
50 cases of mTSS were identified or referred to tertiary care facilities. The health clinic records review  
51  
52 identified no participants attending health services for febrile episodes or any other symptom of mTSS.  
53  
54  
55  
56 HDSS census review monthly and at end study identified no deaths among our study participants. At  
57  
58  
59  
60

1  
2  
3 nurse routine screening, 10 girls (5 pads, 5 cups) reported heavy bleeding, 80% of whom had reported  
4  
5 this pre-intervention. These girls were referred for tertiary care facilities, where the consultant  
6  
7 gynecologist reported no abnormal findings, but provided hematinics.  
8  
9

### 10 11 12 *Staph aureus prevalence survey*

13  
14 Of 604 vaginal swabs collected among eligible participants, *S aureus* was detected in 65 (10.8%)  
15  
16 samples. When stratified by duration of intervention, *S aureus* prevalence was 13.0% in the first  
17  
18 intervention month, with no statistically significant difference between groups (10.5% cups, 13.6% pads,  
19  
20 15.2% controls;  $p=0.84$ ). Prevalence during intervention follow up, after a median of 4 months (range 2-  
21  
22 11 months) was 10.2% with no difference between groups (9.4% cups, 10.7% pads, 10.5% controls;  $p =$   
23  
24 0.92). There was no significant difference in prevalence between baseline and during use, overall or  
25  
26 within or between groups (figure 3).  
27  
28  
29  
30  
31  
32

### 33 *Toxic shock syndrome toxin (TSST)-1*

34  
35 In the first batch of 69 participants with vaginal swabs positive for *S aureus*, 49 girls were available to  
36  
37 collect a second swab to examine presence of TSST-1. Of these swabs, 10 (20.4%) yielded *S. aureus*.  
38  
39 These second level swabs were immediately processed to examine the presence of TSST-1 toxin. Of  
40  
41 these 10, two (20%) tested positive for TSST-1. Neither of these was a girl provided with a menstrual  
42  
43 cup; both were in the sanitary pad group. Study participants were followed up, including these two girls,  
44  
45 and found to be healthy and asymptomatic.  
46  
47  
48  
49  
50  
51

### 52 *Menstrual cup loss or damage*

53  
54 Of 225 girls provided cups, 29 were lost to follow up due to migration ( $n=21$  girls) or withdrawal ( $n=8$ ).  
55  
56 Of the 195 retained girls, 15 (9%) girls reported cup loss (3 participants, including one girl twice),  
57  
58  
59  
60

1  
2  
3 damage (2; one burned cup when boiling, one cup eaten by rats), too small (3, replaced with size A due  
4  
5 to leaking), or dropped inside the latrine (7 cups). Examination of cups during screening revealed only  
6  
7 minor abrasions, or small damage to tail ends when cut to size.  
8  
9

### 10 11 12 *E coli growth on used menstrual cups*

13  
14 In the last study quarter, a random selection of 1 in 4 cups was selected among 134 girls remaining in  
15  
16 the study. Duration of provision was used to stratify the 35 cups, with 17 representing new cup users  
17  
18 provided cups for less than 6 months, and 18 established cup users provided for 6 months or longer  
19  
20 (table 1). Five unused cups acted as controls. Of the 40 cups processed, there was no *E coli* on control  
21  
22 cups, while 13 of 35 used cups had growth (37.1%, 95% CI 21.1%-53.1%; table 3). By duration of cup  
23  
24 provision, the prevalence of *E coli* growth generated was greatest in newer users, with growth on 9 of 17  
25  
26 (53%, 95% CI 29.3%-76.7%) compared with 4 in 18 (22.2%, 95% CI 2.9%-41.1%) cups of established  
27  
28 users, a difference of 31% (p=0.12).  
29  
30  
31  
32  
33  
34

## 35 **DISCUSSION**

36  
37  
38 We observed 10.8% prevalence of *S aureus* in 14-16 year-old girls in this area. This is at the lower range  
39  
40 of the 10%–20% vaginal carriage rate reported in the general population in high income countries (34,  
41  
42 49). We found no statistical difference in the prevalence of *S aureus* detected before and during  
43  
44 intervention with cups and pads, with no significant difference between study groups. No cases of mTSS  
45  
46 were detected and TSST-1 was not found among girls using cups with laboratory confirmed *S aureus*  
47  
48 colonization. No harms were detected although *E coli* was grown on a third of used cups.  
49  
50  
51  
52  
53  
54  
55  
56  
57  
58  
59  
60

1  
2  
3 To our knowledge, no other studies have evaluated the safety of menstrual products among schoolgirls  
4  
5 in LMIC settings. This study identified the feasibility of such studies, and that laboratory evaluations can  
6  
7 be conducted to ensure rigor. However, as a feasibility study, a number of limitations are evident. For  
8  
9 logistic reasons we were unable to conduct complete sampling for a 'before' and 'after' *S aureus*  
10  
11 prevalence survey. While sampling at different stages may have introduced bias, we detected no  
12  
13 difference in prevalence between girls sampled early during intervention, compared with later or  
14  
15 between study groups, and the point prevalence remained within the 'normal' range (50). Only a small  
16  
17 proportion of *S aureus* positives were identified positive on second testing, leaving few (10) samples for  
18  
19 isolation of TSST-1, preventing analysis of risk factors. *S aureus* was only detected in 20% of girls who  
20  
21 had been positive at first screening, when swabbing was repeated. Transience is a recognized  
22  
23 phenomenon in vaginal carriage, with higher persistence in nasal than vaginal carriage (50). Colonization  
24  
25 also varies according to the time of the menstrual cycle due to altered levels of iron, pH, oxygen, carbon  
26  
27 dioxide, redox potential, and/or osmolarity (34, 51, 52). While we found no adverse events among the  
28  
29 participants followed, 10% of girls migrated out of the study area. The HDSS system allowed us to visit  
30  
31 all homes with no cases of TSS reported from these families. We assessed all health clinic registers,  
32  
33 reviewing girls by name, and no TSS cases were found. If a girl was registered under a different name we  
34  
35 would have missed this, however, no cases of mTSS were diagnosed, and our HDSS census identified no  
36  
37 study participant had died. We note, however, mTSS is rare and our population studied was small. We  
38  
39 used indole test to generate *E coli* growth (48); confirmatory tests would more accurately assess  
40  
41 contamination risk of *E coli* (53), which we assume would have been equally distributed across groups  
42  
43 stratified by time. We did not consider evaluating *E coli* on pads or cloths, which in hind-sight may have  
44  
45 provided an important comparison.  
46  
47  
48  
49  
50  
51  
52

## 53 54 55 56 **Interpretation**

1  
2  
3 Studies in high income countries have shown menstrual cups to be safe and effective. Post marketing  
4 surveillance of over 100 million soft menstrual cup users, and examination of vaginal pH and microflora,  
5  
6 urinalysis, pap smears, and colposcopy in 406 subjects using cups for 3 months found no evidence of  
7  
8 adverse effects among menstrual cup users (33). One study examined whether menstrual cups act as a  
9  
10 fomite for *S aureus* or are conducive to contamination with TSST-1; no association was found (32). Our  
11  
12 surveillance did not detect mTSS among participants using menstrual cups or other menstrual care  
13  
14 items. While mTSS is a rare condition with a risk of 1-16 cases per 100,000 women years and has a lower  
15  
16 mortality than non-menstrual TSS, it may still be life threatening (54). Menstrual TSS requires vaginal  
17  
18 colonization with a toxin-producing strain of *S. aureus* in the vagina during menstruation, in the absence  
19  
20 of a positive antibody (titer of 1:32) (50). TSST-1 is a super antigen, causing an exaggerated release of  
21  
22 inflammatory cytokines responsible for the symptoms of clinical disease (50). It is believed that mTSS  
23  
24 develops from a site of colonization rather than from infection (34, 39). In our study TSST-1 toxin was  
25  
26 detected in two of ten *S aureus* isolates, a prevalence of 20% in girls with persistent *S aureus*, similar to  
27  
28 the range detected in other studies (55-57). The two girls, both in the sanitary pad arm with no access to  
29  
30 menstrual cups, were healthy and did not exhibit any sign or symptom of mTSS. Other studies have  
31  
32 shown the presence of TSST-1 detected among healthy individuals with protective antibody titers (>100)  
33  
34 (58). One case of mTSS has been reported in Canada in a woman with Hashimoto thyroiditis, an  
35  
36 autoimmune disease, within 10 days of her first cup use (59). Further surveillance of mTSS among users  
37  
38 is thus warranted.  
39  
40  
41  
42  
43  
44  
45  
46  
47  
48

49  
50 *E coli* growth was generated on a quarter of cups, with the greatest proportion among girls who had  
51  
52 been allocated cups within 6 months. Separate questioning of girls revealed dropping of cups occurred  
53  
54 more frequently in early use (60). Inexperienced girls reported difficulty changing and emptying in  
55  
56 school where locks were absent from latrine doors, and conditions were cramped and unlit with the  
57  
58  
59  
60

1  
2  
3 stress of other girls waiting outside to use the latrine (60). School eligibility required a threshold of 70  
4  
5 pupils or less per latrine, separate toilets for girls, and water observed at baseline in this study (41). We  
6  
7 note in a separate paper that hand-washing was reported more commonly among girls using cups than  
8  
9 the other groups, suggesting nurse training and caution about cup hygiene was understood by girls (61).  
10  
11 However, other studies show girls' inability to adequately clean themselves after defecation, resulting in  
12  
13 vaginal contamination with ten different micro-organisms including *E coli* (62). Our research supported  
14  
15 hygienic use of all menstrual products, with intense monitoring of all participants over time. We thus  
16  
17 offer caution to programmes embarking on menstrual cup or pad distribution to ensure adequate safety  
18  
19 procedures, including information, education, and communication are provided to girls, and support of  
20  
21 WASH infrastructure in their schools (63). Similarly, we note provision of hygiene supplies and follow-up  
22  
23 of nurses improved the hygienic circumstances for cup use in this LMIC setting.  
24  
25  
26  
27  
28  
29  
30

## 31 CONCLUSIONS

32  
33  
34  
35 To our knowledge, no studies have evaluated the safety of menstrual products used by schoolgirls in  
36  
37 LMIC. In this study, we did not detect harms associated with menstrual cups use among adolescent  
38  
39 schoolgirls in this rural African setting. The vaginal colonization rate of *S aureus* was within the range of  
40  
41 published data, and similarly we observed only a 20% rate of TSST-1 among girls with persistent *S aureus*  
42  
43 colonization, with no direct association with menstrual cups. Further studies such as large scale trials  
44  
45 and post-marketing surveillance is recommended to verify findings from this feasibility study. Studies  
46  
47 are required to further strengthen methodological approaches used in LMICs. Presence of *E coli* grown  
48  
49 on a quarter of sampled cups and higher rates among new users, despite substantive education by study  
50  
51 nurses, suggests hygiene education and WASH infrastructures in schools needs to be strengthened (64,  
52  
53  
54  
55  
56  
57  
58  
59  
60 65), and cup provision requires a strong educational component.

### Acknowledgements

We thank the schools, girls, staff, and stakeholders contributing to this study, funded by the Joint Global Health Trials of the UK Medical Research Council, the Department for International Development, and the Wellcome Trust; we thank Mooncups Ltd for providing cups at a discounted price, and the Director of KEMRI for approving the manuscript. The findings and conclusions of this report are those of the authors and do not necessarily represent the official position of the Centers for Disease Control and Prevention.

### Disclosure of interest

Authors confirm no conflict of interest exist.

### Authors Contributions

JJO, LA, CaO, and COO carried out the experiments. EN, KO, JO conducted the field work. JO, EN, PPH and KFL coordinated clinical follow-up. PPH, and CIO performed the statistical analysis. PPH, LM, COO, KA, BF and KFL conceived the study, participated in the design and coordination, and drafted the manuscript. All authors read and approved the final manuscript.

### Ethical approval

The study was approved by KEMRI's National Ethical Review Committee (Ethics number: 2198), and the Liverpool School of Tropical Medicine's Ethics Committee (Ethics number: 12.11). The Institutional Review Board of the US Centers for Disease Control and Prevention approved a non-engaged waiver. Written informed consent and assent from parents and girls, respectively, were required for participation.



## Funding

This study was funded by the UK Medical Research Council/Department for International Development/Wellcome Trust (Joint Global Health) Trials award scheme (G1100677/1).

## References

1. Sommer M. Where the education system and women's bodies collide: The social and health impact of girls' experiences of menstruation and schooling in Tanzania. *J Adolesc.* 2010;33(4):521-9.
2. Mahon T, Fernandes M. Menstrual hygiene in South Asia: a neglected issue for WASH (water, sanitation and hygiene) programmes. *Gender & Development.* 2010;18(1):99-113.
3. Mason L, Nyothach E, Alexander K, Odhiambo FO, Eleveld A, Vulule J, et al. 'We keep it secret so no one should know' - a qualitative study to explore young schoolgirls attitudes and experiences with menstruation in rural Western Kenya. *PLoS One.* 2013;8(11):e79132.
4. Sahin M. Guest editorial: tackling the stigma and gender marginalization related to menstruation via WASH in schools programmes. *Waterlines.* 2015;34(1).
5. Phillips-Howard PA, Otieno G, Burmen B, Otieno F, Odongo F, Odour C, et al. Menstrual Needs and Associations with Sexual and Reproductive Risks in Rural Kenyan Females: A Cross-Sectional Behavioral Survey Linked with HIV Prevalence. *J Womens Health (Larchmt).* 2015;24(10):801-11.
6. Sommer M, Caruso BA, Sahin M, Calderon T, Cavill S, Mahon T, et al. A Time for Global Action: Addressing Girls' Menstrual Hygiene Management Needs in Schools. *PLoS Med.* 2016;13(2):e1001962.

- 1  
2  
3 7. Sumpter C, Torondel B. A systematic review of the health and social effects of menstrual  
4 hygiene management. PLoS One. 2013;8(4):e62004.  
5  
6
- 7  
8 8. Das P, Baker KK, Dutta A, Swain T, Sahoo S, Das BS, et al. Menstrual Hygiene  
9 Practices, WASH Access and the Risk of Urogenital Infection in Women from Odisha, India.  
10 PLoS One. 2015;10(6):e0130777.  
11  
12
- 13 9. El-Gilany AH, Badawi K, El-Fedawy S. Menstrual hygiene among adolescent schoolgirls  
14 in Mansoura, Egypt. Reprod Health Matters. 2005;13(26):147-52.  
15  
16
- 17 10. Gultie T, Hailu D, Workneh Y. Age of menarche and knowledge about menstrual  
18 hygiene management among adolescent school girls in Amhara province, Ethiopia: implication  
19 to health care workers & school teachers. PLoS One. 2014;9(9):e108644.  
20  
21
- 22 11. Baisley K, Changalucha J, Weiss HA, Mugeye K, Everett D, Hambleton I, et al. Bacterial  
23 vaginosis in female facility workers in north-western Tanzania: prevalence and risk factors. Sex  
24 Transm Infect. 2009;85(5):370-5.  
25  
26
- 27 12. Dasgupta A, Sarkar M. Menstrual Hygiene: How Hygienic is the Adolescent Girl? Indian  
28 J Community Med. 2008;33(2):77-80.  
29  
30
- 31 13. Mudey AB, Kesharwani N, Mudey GA, Goyal RC. A cross-sectional study on awareness  
32 regarding safe and hygienic practices amongst school going adolescent girls in rural area of  
33 wardha district, India. Global journal of health science. 2010;2(2):225.  
34  
35
- 36 14. Misra P, Upadhyay RP, Sharma V, Anand K, Gupta V. A community-based study of  
37 menstrual hygiene practices and willingness to pay for sanitary napkins among women of a rural  
38 community in northern India. The National medical journal of India. 2013;26(6):335-7.  
39  
40  
41  
42  
43  
44  
45  
46  
47  
48  
49  
50  
51  
52  
53  
54  
55  
56  
57  
58  
59  
60

- 1  
2  
3 15. Tamiru S, Mamo K, Acidria P, al. e. Towards a sustainable solution for school menstrual  
4  
5 hygiene management: cases of Ethiopia, Uganda, South-Sudan, Tanzania, and Zimbabwe  
6  
7 Waterlines. 2015;34(1).  
8  
9
- 10 16. Shah SP, Rajesh N, Shah PP, Modi DK, Desai SA, Lata D. Improving quality of life with  
11  
12 new menstrual hygiene practices among adolescent tribal girls in rural Gujarat, India.  
13  
14 Reproductive Health Matters. 2013;21(41):205-13.  
15  
16
- 17 17. Fehr A. Stress, menstruation and school attendance: effects of water access among  
18  
19 adolescent girls in south Gondar, Ethiopia. Atlanta, GA: Emory University; 2011.  
20  
21
- 22 18. Sommer M, Caruso B, Mahon T, Phillips-Howard P, editors. The impact of sub-optimal  
23  
24 water, sanitation (WaSH) and menstrual hygiene management (MHM) on health and gender  
25  
26 equity: use of scientific evidence to define priorities. Symposium 24, p 108. In: Annual Meeting  
27  
28 Program. The American journal of tropical medicine and hygiene; 2014 November 1, 2014; New  
29  
30 Orleans: ASTMH.  
31  
32
- 33 19. Montgomery P, Ryus CR, Dolan CS, Dopson S, Scott LM. Sanitary pad interventions for  
34  
35 girls' education in Ghana: a pilot study. PLoS One. 2012;7(10):e48274.  
36  
37
- 38 20. Crofts T, Fisher WA. Menstrual Hygiene in Ugandan Schools and investigation of low-  
39  
40 cost sanitary pads. Journal of Water, Sanitation and Hygiene for Development 2012;2:50-8.  
41  
42
- 43 21. Garg R, Goyal S, Gupta S. India moves towards menstrual hygiene: subsidized sanitary  
44  
45 napkins for rural adolescent girls - issues and challenges. Maternal and Child Health Journal.  
46  
47 2012;16:767-74.  
48  
49
- 50 22. Oster E, Thornton R. Menstruation, Sanitary Products and School Attendance: Evidence  
51  
52 from a Randomized Evaluation. Am Econ J: Appl Economics. 2011;3(1):91-100.  
53  
54  
55  
56  
57  
58  
59  
60

- 1  
2  
3  
4  
5  
6  
7  
8  
9  
10  
11  
12  
13  
14  
15  
16  
17  
18  
19  
20  
21  
22  
23  
24  
25  
26  
27  
28  
29  
30  
31  
32  
33  
34  
35  
36  
37  
38  
39  
40  
41  
42  
43  
44  
45  
46  
47  
48  
49  
50  
51  
52  
53  
54  
55  
56  
57  
58  
59  
60
23. Beksinska ME, Smit J, Greener R, Todd CS, Lee ML, Maphumulo V, et al. Acceptability and performance of the menstrual cup in South Africa: a randomized crossover trial comparing the menstrual cup to tampons or sanitary pads. *J Womens Health (Larchmt)*. 2015;24(2):151-8.
24. APHRC. Policy Brief: Attitudes towards, and acceptability of, menstrual cups as a method for managing menstruation. Nairobi: African Population and Health Research Center; <https://www.aphrc.org/download/?id=4> (accessed 1st June 2013), 2010 November 2010. Report No.
25. Averbach S, Sahin-Hodoglugil N, Musara P, Chipato T, van der Straten A. Duet for menstrual protection: a feasibility study in Zimbabwe. *Contraception*. 2009;79(6):463-8.
26. Tellier M, Hyttel M, Glad M. Assessing acceptability and hygienic safety of menstrual cups as menstrual management methods for vulnerable young women in Uganda Red Cross Society's Life Planning Skills Project. Kampala, Uganda: 2012.
27. Mason L, Laserson K, Oruko K, Nyothach E, Alexander K, Odhiambo F, et al. Adolescent schoolgirls' experiences of menstrual cups and pads in rural western Kenya: a qualitative study. *Waterlines*. 2015;34(1):15-30.
28. Howard C, Rose CL, Trouton K, Stamm H, Marentette D, Kirkpatrick N, et al. FLOW (finding lasting options for women): multicentre randomized controlled trial comparing tampons with menstrual cups. *Can Fam Physician*. 2011;57(6):e208-15.
29. Karnaky KJ. Internal menstrual protection with the rubber menstrual cup. *Obstet Gynecol*. 1962;19:688-91.
30. Mooncups. Advice and Facts : <http://www.mooncup.co.uk/advice-centre/faqs.html> (last accessed 29 June 2014). October 25th 2011. Report No.

- 1  
2  
3  
4  
5  
6  
7  
8  
9  
10  
11  
12  
13  
14  
15  
16  
17  
18  
19  
20  
21  
22  
23  
24  
25  
26  
27  
28  
29  
30  
31  
32  
33  
34  
35  
36  
37  
38  
39  
40  
41  
42  
43  
44  
45  
46  
47  
48  
49  
50  
51  
52  
53  
54  
55  
56  
57  
58  
59  
60
31. Stewart K, Greer R, Powell M. Women's experience of using the Mooncup. *J Obstet Gynaecol.* 2010;30(3):285-7.
32. Tierno PM, Hanna BA. Propensity of tampons and barrier contraceptives to amplify *Staphylococcus aureus* Toxic shock syndrome toxin-I. *Infect Dis Obstet Gynecol.* 1994;2(3):140-5.
33. North B, Oldham M. Preclinical, Clinical, and Over-the-Counter Postmarketing Experience with a New Vaginal Cup: Menstrual Collection. *J Womens Health.* 2011;20(2).
34. Smith CB, Noble V, Bensch R, Ahlin PA, Jacobson JA, Latham RH. Bacterial flora of the vagina during the menstrual cycle: findings in users of tampons, napkins, and sea sponges. *Ann Intern Med.* 1982;96(6 Pt 2):948-51.
35. Todd JK, Wiesenthal AM, Ressman M, Caston SA, Hopkins RS. Toxic shock syndrome. II. Estimated occurrence in Colorado as influenced by case ascertainment methods. *Am J Epidemiol.* 1985;122(5):857-67.
36. Reiser RF, Hinzman SJ, Bergdoll MS. Production of toxic shock syndrome toxin 1 by *Staphylococcus aureus* restricted to endogenous air in tampons. *J Clin Microbiol.* 1987;25(8):1450-2.
37. Parsonnet J, Hansmann MA, Delaney ML, Modern PA, Dubois AM, Wieland-Alter W, et al. Prevalence of toxic shock syndrome toxin 1-producing *Staphylococcus aureus* and the presence of antibodies to this superantigen in menstruating women. *J Clin Microbiol.* 2005;43(9):4628-34.
38. Lansdell LW, Taplin D, Aldrich TE. Recovery of *Staphylococcus aureus* from multiple body sites in menstruating women. *J Clin Microbiol.* 1984;20(3):307-10.

- 1  
2  
3 39. Chesney PJ, Bergdoll MS, Davis JP, Vergeront JM. The disease spectrum, epidemiology,  
4 and etiology of toxic-shock syndrome. *Annu Rev Microbiol.* 1984;38:315-38.  
5  
6  
7  
8 40. Gaventa S, Reingold AL, Hightower AW, Broome CV, Schwartz B, Hoppe C, et al.  
9  
10 Active surveillance for toxic shock syndrome in the United States, 1986. *Rev Infect Dis.* 1989;11  
11  
12 Suppl 1:S28-34.  
13  
14  
15 41. Alexander K, Oduor C, Nyothach E, Laserson K, Amek N, Eleveld A, et al. Water,  
16  
17 Sanitation and Hygiene Conditions in Kenyan Rural Schools: Are Schools Meeting the Needs of  
18  
19 Menstruating Girls? *Water.* 2014;6:1453-66.  
20  
21  
22 42. Phillips-Howard P, Nyothach E, ter Kuile F, Omoto J, Wang D, Zeh C, et al. Menstrual  
23  
24 cups and sanitary pads to reduce school attrition, and sexually transmitted and reproductive tract  
25  
26 infections: a cluster randomised controlled feasibility study in rural western Kenya. *BMJ open.*  
27  
28 2016;6:e013229. <http://dx.doi.org/10.1136/bmjopen-2016-013229>.  
29  
30  
31 43. Odhiambo FO, Laserson KF, Sewe M, Hamel MJ, Feikin DR, Adazu K, et al. Profile:  
32  
33 The KEMRI/CDC Health and Demographic Surveillance System--Western Kenya. *Int J*  
34  
35 *Epidemiol.* 2012;41(4):977-87.  
36  
37  
38 44. Oster E, Thornton R. Determinants of technology adoption: Peer effects in menstrual cup  
39  
40 up-take. *Journal of the European Economic Association.* 2012;10(6):1263-93.  
41  
42  
43 45. Tanksale VS, Sahasrabhojane M, Patel V, Nevrekar P, Menezes S, Mabey D. The  
44  
45 reliability of a structured examination protocol and self administered vaginal swabs: a pilot study  
46  
47 of gynaecological outpatients in Goa, India. *Sex Transm Infect.* 2003;79(3):251-3.  
48  
49  
50 46. Hobbs MM, van der Pol B, Totten P, Gaydos CA, Wald A, Warren T, et al. From the  
51  
52 NIH: proceedings of a workshop on the importance of self-obtained vaginal specimens for  
53  
54 detection of sexually transmitted infections. *Sex Transm Dis.* 2008;35(1):8-13.  
55  
56  
57  
58  
59  
60

- 1  
2  
3  
4  
5  
6  
7  
8  
9  
10  
11  
12  
13  
14  
15  
16  
17  
18  
19  
20  
21  
22  
23  
24  
25  
26  
27  
28  
29  
30  
31  
32  
33  
34  
35  
36  
37  
38  
39  
40  
41  
42  
43  
44  
45  
46  
47  
48  
49  
50  
51  
52  
53  
54  
55  
56  
57  
58  
59  
60
47. Knox J, Tabrizi SN, Miller P, Petoumenos K, Law M, Chen S, et al. Evaluation of self-collected samples in contrast to practitioner-collected samples for detection of Chlamydia trachomatis, Neisseria gonorrhoeae, and Trichomonas vaginalis by polymerase chain reaction among women living in remote areas. *Sex Transm Dis.* 2002;29(11):647-54.
48. Blazevic D, Ederer G. *Principals of biochemical tests in diagnostic microbiology.* New York, NY: John Wiley and Sons; 1975.
49. Guinan ME, Dan BB, Guidotti RJ, Reingold AL, Schmid GP, Bettoli EJ, et al. Vaginal colonization with Staphylococcus aureus in healthy women: a review of four studies. *Ann Intern Med.* 1982;96(6 Pt 2):944-7.
50. Parsonnet J, Hansmann MA, Seymour JL, Delaney ML, Dubois AM, Modern PA, et al. Persistence survey of toxic shock syndrome toxin-1 producing Staphylococcus aureus and serum antibodies to this superantigen in five groups of menstruating women. *BMC Infect Dis.* 2010;10:249.
51. Wagner G, Ottesen B. Vaginal physiology during menstruation. *Ann Intern Med.* 1982;96(6 Pt 2):921-3.
52. Yarwood JM, Schlievert PM. Oxygen and carbon dioxide regulation of toxic shock syndrome toxin 1 production by Staphylococcus aureus MN8. *J Clin Microbiol.* 2000;38(5):1797-803.
53. Bernasconi C, Volponi G, Bonadonna L. Comparison of three different media for the detection of E. coli and coliforms in water. *Water Sci Technol.* 2006;54(3):141-5.
54. Todd JK. Toxic shock syndrome. *Clinical microbiology reviews.* 1988;1(4):432-46.
55. Dickgiesser N, Brombacher A. Staphylococcus aureus producing toxic shock syndrome toxin 1 (TSST-1) in clinical specimens and vaginal swabs in Mannheim, West Germany.

Zentralblatt für Bakteriologie, Mikrobiologie, und Hygiene Series A, Medical microbiology, infectious diseases, virology, parasitology. 1987;265(3-4):323-9.

56. Linnemann CC, Jr., Staneck JL, Hornstein S, Barden TP, Rauh JL, Bonventre PF, et al.

The epidemiology of genital colonization with *Staphylococcus aureus*. *Ann Intern Med*.

1982;96(6 Pt 2):940-4.

57. Lowy FD. *Staphylococcus aureus* infections. *N Engl J Med*. 1998;339(8):520-32.

58. Crass BA, Bergdoll MS. Toxin involvement in toxic shock syndrome. *J Infect Dis*.

1986;153(5):918-26.

59. Mitchell M, Bisch S, Arnfield S, Hosseini-Moghaddam S. A confirmed case of toxic shock syndrome associated with the use of a menstrual cup. *Can J Infect Dis Med Microbiol*.

2015;26(4):218-20.

60. Oduor C, Alexander K, Oruko K, Nyothach E, Mason L, Odhiambo F, et al. Schoolgirls' experiences of changing and disposal of menstrual hygiene items and inferences for WASH in

schools. *Waterlines*. 2015;34(4):397-411.

61. Nyothach E, Alexander K, Oduor C, Mason L, Oruko K, Odhiambo F, et al.

Handwashing for menstrual hygiene management among primary schoolgirls in rural western Kenya. *Waterlines*. 2015;34(4):279-95.

62. Cemek F, Odabas D, Senel U, Kocaman AT. Personal hygiene and vulvovaginitis in prepubertal children. *Journal of pediatric and adolescent gynecology*. 2015.

63. Alexander KT, Dreibelbis R, Freeman MC, Ojony B, Rheingans R. Improving service delivery of water, sanitation, and hygiene in primary schools: a cluster-randomized trial in

western Kenya. *J Water Health*. 2013;11(3):507-19.



1  
2  
3 64. Sommer M, Sutherland C, Chandra-Mouli V. Putting menarche and girls into the global  
4 population health agenda. *Reprod Health*. 2015;12(1):24.  
5  
6

7  
8 65. Sommer M, Sahin M. Overcoming the taboo: advancing the global agenda for menstrual  
9 hygiene management for schoolgirls. *Am J Public Health*. 2013;103(9):1556-9.  
10  
11  
12  
13  
14  
15  
16  
17  
18  
19  
20  
21  
22  
23  
24  
25  
26  
27  
28  
29  
30  
31  
32  
33  
34  
35  
36  
37  
38  
39  
40  
41  
42  
43  
44  
45  
46  
47  
48  
49  
50  
51  
52  
53  
54  
55  
56  
57  
58  
59  
60

For peer review only

1  
2  
3  
4  
5  
6  
7  
8  
9  
10  
11  
12  
13  
14  
15  
16  
17  
18  
19  
20  
21  
22  
23  
24  
25  
26  
27  
28  
29  
30  
31  
32  
33  
34  
35  
36  
37  
38  
39  
40  
41  
42  
43  
44  
45  
46  
47  
48  
49  
50  
51  
52  
53  
54  
55  
56  
57  
58  
59  
60

**FIGURES**

Figure 1

Menstrual cup distributed to girls in cup allocated schools

Figure 2

Flow diagram for action for suspected mTSS event

Figure 3

Prevalence of *Staphylococcus aureus* early and during intervention by study group

For peer review only

Table 1 *E.coli* growth generated on cups over differing time spans

|           |                           | Total cups available*<br>population represented | Cups randomly sampled | Proportion cups from available sample | Number with <i>E coli</i> growth | Prevalence (95% CI) |
|-----------|---------------------------|-------------------------------------------------|-----------------------|---------------------------------------|----------------------------------|---------------------|
| New       | <2m use                   | 14                                              | 6                     |                                       | 3                                | 50% (10.0%-90.0%)   |
|           | 3-5m use                  | 51                                              | 11                    |                                       | 6                                | 55% (25.6%-84.4%)   |
|           | All new users (<6m)       | 65                                              | 17                    | 25%                                   | 9                                | 53% (29.3%-76.7%)   |
| Long term | Established (6-9m)        | 58                                              | 12                    |                                       | 4                                | 33.3% (6.6%-60.0%)  |
|           | Longer-term (9m>)         | 11                                              | 6                     |                                       | 0                                | 0%                  |
|           | All long-term users (6m>) | 69                                              | 18                    | 26%                                   | 4                                | 22.2% (2.9%-41.1%)  |
|           |                           | 134                                             | 35                    | 26%                                   | 13                               | 37.1% (21.1%-53.1%) |

\* Available population at cup-check in last study quarter

1  
2  
3  
4  
5  
6  
7  
8  
9  
10  
11  
12  
13  
14  
15  
16  
17  
18  
19  
20  
21  
22  
23  
24  
25  
26  
27  
28  
29  
30  
31  
32  
33  
34  
35  
36  
37  
38  
39  
40  
41  
42  
43  
44  
45  
46  
47  
48  
49  
50  
51  
52  
53  
54  
55  
56  
57  
58  
59  
60

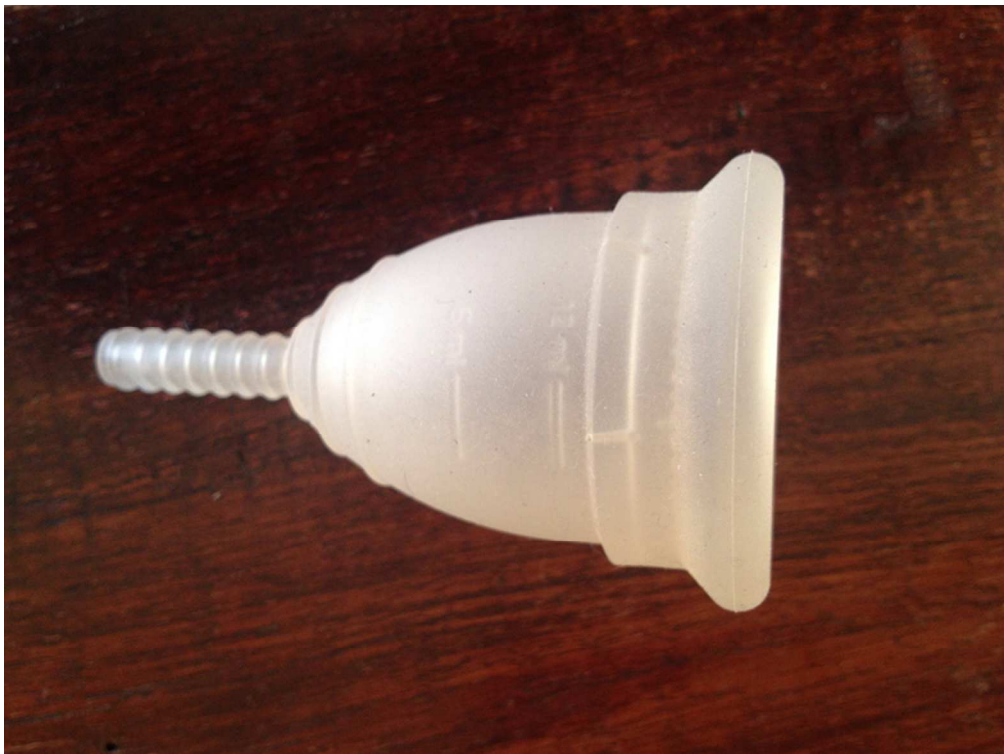

The Mooncup  
figure 1  
68x51mm (300 x 300 DPI)

ew only

1  
2  
3  
4  
5  
6  
7  
8  
9  
10  
11  
12  
13  
14  
15  
16  
17  
18  
19  
20  
21  
22  
23  
24  
25  
26  
27  
28  
29  
30  
31  
32  
33  
34  
35  
36  
37  
38  
39  
40  
41  
42  
43  
44  
45  
46  
47  
48  
49  
50  
51  
52  
53  
54  
55  
56  
57  
58  
59  
60

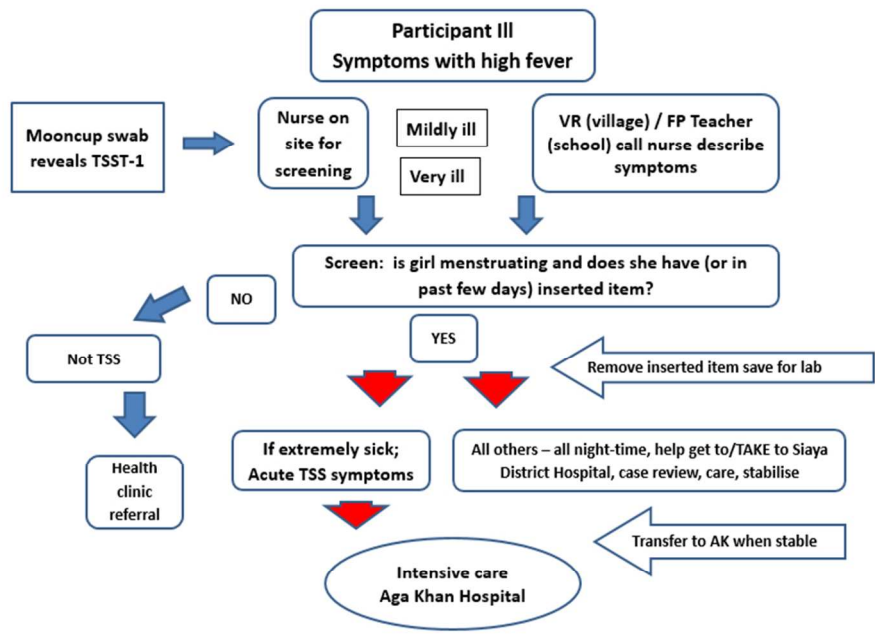

Safety monitoring for Toxic shock syndrome  
figure 2  
71x53mm (300 x 300 DPI)

Review only

1  
2  
3  
4  
5  
6  
7  
8  
9  
10  
11  
12  
13  
14  
15  
16  
17  
18  
19  
20  
21  
22  
23  
24  
25  
26  
27  
28  
29  
30  
31  
32  
33  
34  
35  
36  
37  
38  
39  
40  
41  
42  
43  
44  
45  
46  
47  
48  
49  
50  
51  
52  
53  
54  
55  
56  
57  
58  
59  
60

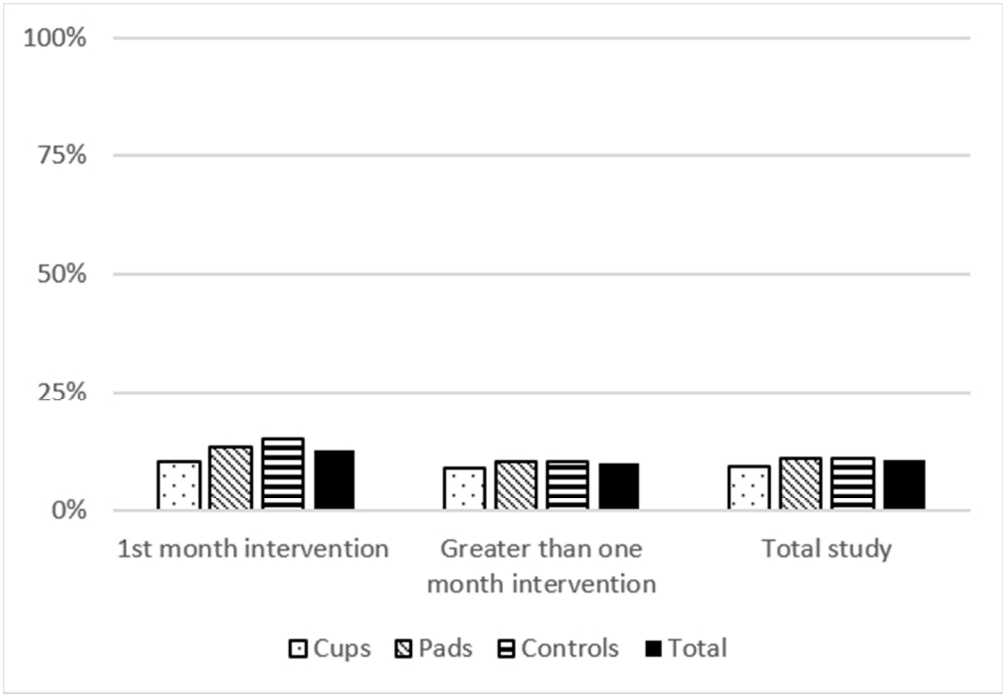

Prevalence of vaginal Staphylococcus aureus across study  
figure 3  
109x76mm (144 x 144 DPI)

View only

## STROBE Statement

**Examining the safety of menstrual cups among rural primary school girls in western Kenya: observational studies nested in a randomized controlled feasibility study**

| Section                   | #  | Checklist item                                                                                                                                                                       | Page reported |
|---------------------------|----|--------------------------------------------------------------------------------------------------------------------------------------------------------------------------------------|---------------|
| Title and abstract        | 1  | (a) Indicate the study's design with a commonly used term in the title or the abstract                                                                                               | 1             |
|                           |    | (b) Provide in the abstract an informative and balanced summary of what was done and what was found                                                                                  | 2-3           |
| <b>Introduction</b>       |    |                                                                                                                                                                                      |               |
| Background/ rationale     | 2  | Explain the scientific background and rationale for the investigation being reported                                                                                                 | 4             |
| Objectives                | 3  | State specific objectives, including any pre-specified hypotheses                                                                                                                    | 4-5           |
| <b>Methods</b>            |    |                                                                                                                                                                                      |               |
| Study design              | 4  | Present key elements of study design early in the paper                                                                                                                              | 5-6           |
| Setting                   | 5  | Describe the setting, locations, and relevant dates, including periods of recruitment, exposure, follow-up, and data collection                                                      | 5-6           |
| Participants              | 6  | (a) Give the eligibility criteria, and the sources and methods of selection of participants                                                                                          | 5-6           |
| Variables                 | 7  | Clearly define all outcomes, exposures, predictors, potential confounders, and effect modifiers. Give diagnostic criteria, if applicable                                             | 6-9           |
| Data sources/ measurement | 8  | For each variable of interest, give sources of data and details of methods of assessment (measurement). Describe comparability of assessment methods if there is more than one group | 6-9           |
| Bias                      | 9  | Describe any efforts to address potential sources of bias                                                                                                                            | 5-6           |
| Study size                | 10 | Explain how the study size was arrived at                                                                                                                                            | 5-6           |
| Quantitative variables    | 11 | Explain how quantitative variables were handled in the analyses. If applicable, describe which groupings were chosen and why                                                         | 7-9           |
| Statistical methods       | 12 | (a) Describe all statistical methods, including those used to control for confounding                                                                                                | 7-9           |
|                           |    | (b) Describe any methods used to examine subgroups and interactions                                                                                                                  | 7-9           |
|                           |    | (c) Explain how missing data were addressed                                                                                                                                          | 7-9           |
|                           |    | (d) If applicable, describe analytical methods taking account of sampling strategy                                                                                                   | n/a           |
|                           |    | (e) Describe any sensitivity analyses                                                                                                                                                | n/a           |
| <b>Results</b>            |    |                                                                                                                                                                                      |               |
| Participants              | 13 | (a) Report numbers of individuals at each stage of study—eg numbers potentially eligible, examined for eligibility, confirmed                                                        | 10-12         |

|                          |     |                                                                                                                                                                                                              |                |
|--------------------------|-----|--------------------------------------------------------------------------------------------------------------------------------------------------------------------------------------------------------------|----------------|
|                          |     | eligible, included in the study, completing follow-up, and analysed                                                                                                                                          |                |
|                          |     | (b) Give reasons for non-participation at each stage                                                                                                                                                         | 7-9            |
|                          |     | (c) Consider use of a flow diagram                                                                                                                                                                           | n/a            |
| Descriptive data         | 14* | (a) Give characteristics of study participants (eg demographic, clinical, social) and information on exposures and potential confounders                                                                     | 10-12          |
|                          |     | (b) Indicate number of participants with missing data for each variable of interest                                                                                                                          | 10-12          |
| Outcome data             | 15  | Report numbers of outcome events or summary measures                                                                                                                                                         | 10-12          |
| Main results             | 16  | (a) Give unadjusted estimates and, if applicable, confounder-adjusted estimates and their precision (eg, 95% confidence interval). Make clear which confounders were adjusted for and why they were included | 10-12, Table 1 |
|                          |     | (b) Report category boundaries when continuous variables were categorized                                                                                                                                    | Table 1        |
|                          |     | (c) If relevant, consider translating estimates of relative risk into absolute risk for a meaningful time period                                                                                             | n/a            |
| Other analyses           | 17  | Report other analyses done—eg analyses of subgroups and interactions, and sensitivity analyses                                                                                                               | n/a            |
| <b>Discussion</b>        |     |                                                                                                                                                                                                              |                |
| Key results              | 18  | Summarise key results with reference to study objectives                                                                                                                                                     | 12             |
| Limitations              | 19  | Discuss limitations of the study, taking into account sources of potential bias or imprecision. Discuss both direction and magnitude of any potential bias                                                   | 12-13          |
| Interpretation           | 20  | Give a cautious overall interpretation of results considering objectives, limitations, multiplicity of analyses, results from similar studies, and other relevant evidence                                   | 13-15          |
| Generalisability         | 21  | Discuss the generalisability (external validity) of the study results                                                                                                                                        | 13-15          |
| <b>Other information</b> |     |                                                                                                                                                                                                              |                |
| Funding                  | 22  | Give the source of funding and the role of the funders for the present study and, if applicable, for the original study on which the present article is based                                                | 16             |



# BMJ Open

## Examining the safety of menstrual cups among rural primary school girls in western Kenya: observational studies nested in a randomized controlled feasibility study

|                                 |                                                                                                                                                                                                                                                                                                                                                                                                                                                                                                                                                                                                                                                                                                                                                                                                                                                                                                                                                                    |
|---------------------------------|--------------------------------------------------------------------------------------------------------------------------------------------------------------------------------------------------------------------------------------------------------------------------------------------------------------------------------------------------------------------------------------------------------------------------------------------------------------------------------------------------------------------------------------------------------------------------------------------------------------------------------------------------------------------------------------------------------------------------------------------------------------------------------------------------------------------------------------------------------------------------------------------------------------------------------------------------------------------|
| Journal:                        | <i>BMJ Open</i>                                                                                                                                                                                                                                                                                                                                                                                                                                                                                                                                                                                                                                                                                                                                                                                                                                                                                                                                                    |
| Manuscript ID                   | bmjopen-2016-015429.R1                                                                                                                                                                                                                                                                                                                                                                                                                                                                                                                                                                                                                                                                                                                                                                                                                                                                                                                                             |
| Article Type:                   | Research                                                                                                                                                                                                                                                                                                                                                                                                                                                                                                                                                                                                                                                                                                                                                                                                                                                                                                                                                           |
| Date Submitted by the Author:   | 25-Jan-2017                                                                                                                                                                                                                                                                                                                                                                                                                                                                                                                                                                                                                                                                                                                                                                                                                                                                                                                                                        |
| Complete List of Authors:       | Juma, Jane; Kenya Medical Research Institute, Center for Global Health<br>Nyothach, Elizabeth; Kenya Medical Research Institute, Center for Global Health<br>Laserson, Kayla; Centers for Disease Control and Prevention<br>Oduor, Clifford; Kenya Medical Research Institute, Center for Global Health<br>Arita, Lilian; Kenya Medical Research Institute, Center for Global Health<br>Ouma, Caroline; Kenya Medical Research Institute, Center for Global Health<br>Oruko, Kelvin; Kenya Medical Research Institute, Center for Global Health<br>Omoto, Jackton; Ministry of Health, Siaya District Hospital<br>Mason, Linda; Liverpool School of Tropical Medicine<br>Alexander, Kelly; Liverpool School of Tropical Medicine<br>Fields, Barry; Centers for Disease Control and Prevention<br>Onyango, Clayton; Centers for Disease Control and Prevention<br>Phillips-Howard, Penelope; Liverpool School of Tropical Medicine, Department of Clinical Sciences |
| <b>Primary Subject Heading</b>: | Public health                                                                                                                                                                                                                                                                                                                                                                                                                                                                                                                                                                                                                                                                                                                                                                                                                                                                                                                                                      |
| Secondary Subject Heading:      | Obstetrics and gynaecology                                                                                                                                                                                                                                                                                                                                                                                                                                                                                                                                                                                                                                                                                                                                                                                                                                                                                                                                         |
| Keywords:                       | menstrual hygiene management, menstrual cups, toxic shock syndrome, Escherichia coli, Kenya, adolescent girls                                                                                                                                                                                                                                                                                                                                                                                                                                                                                                                                                                                                                                                                                                                                                                                                                                                      |
|                                 |                                                                                                                                                                                                                                                                                                                                                                                                                                                                                                                                                                                                                                                                                                                                                                                                                                                                                                                                                                    |

SCHOLARONE™  
Manuscripts

1  
2  
3 **Examining the safety of menstrual cups among rural primary school girls in western Kenya:**  
4  
5 **observational studies nested in a randomized controlled feasibility study**  
6  
7  
8  
9

10 **Short title:** Safety of menstrual cups among Kenyan schoolgirls

11  
12 Jane Juma MSc <sup>1</sup>, Elizabeth Nyothach MA <sup>1</sup>, Kayla F. Laserson ScD <sup>1,2</sup>, Clifford Oduor BSc <sup>1</sup>, Lillian Arita Bsc  
13  
14 <sup>1</sup>, Caroline Ouma BSc <sup>1</sup>, Kelvin Oruko BSc <sup>1</sup>, Jackton Omoto MD MMed Obs & Gyn <sup>3</sup>, Linda Mason PhD <sup>4</sup>,  
15  
16 Kelly Alexander MPH <sup>4</sup>, Barry Fields PhD <sup>5</sup>, Clayton O. Onyango PhD <sup>5</sup>, Penelope A. Phillips-Howard PhD  
17  
18  
19 <sup>1,4</sup>

- 20  
21  
22 1. Center for Global Health Research, Kenya Medical Research Institute (KEMRI), Kisumu, Kenya  
23  
24 ([JJuma@kemricdc.org](mailto:JJuma@kemricdc.org), [ENyothach@kemricdc.org](mailto:ENyothach@kemricdc.org), [oduor.clifford@gmail.com](mailto:oduor.clifford@gmail.com);  
25  
26 [LArita@kemricdc.org](mailto:LArita@kemricdc.org), [COuma@kemricdc.org](mailto:COuma@kemricdc.org), [kelvinoov@gmail.com](mailto:kelvinoov@gmail.com))  
27  
28  
29 2. Division of Global Health Protection, Center for Global Health, Centers for Disease Control and  
30  
31 Prevention, Atlanta USA ([kel4@cdc.gov](mailto:kel4@cdc.gov))  
32  
33 3. Department of Obstetrics and Gynecology, Siaya District Hospital, Ministry of Health, Siaya,  
34  
35 Kenya. ([Omotojackton@yahoo.com](mailto:Omotojackton@yahoo.com))  
36  
37  
38 4. Department of Clinical Studies, Liverpool School of Tropical Medicine, Liverpool, UK  
39  
40 ([Penelope.Phillips-Howard@lstm.ac.uk](mailto:Penelope.Phillips-Howard@lstm.ac.uk), [Linda.Mason@liverpool.ac.uk](mailto:Linda.Mason@liverpool.ac.uk), [kellytesh@gmail.com](mailto:kellytesh@gmail.com))  
41  
42  
43 5. Centers for Disease Control and Prevention (CDC)-Kenya, Kisumu, Kenya ([bsf2@cdc.gov](mailto:bsf2@cdc.gov),  
44  
45 [xwl4@cdc.gov](mailto:xwl4@cdc.gov))  
46

47 **Corresponding author**

48  
49 Dr Penelope Phillips-Howard, Department of Clinical Sciences, Liverpool School of Tropical Medicine,  
50  
51 Pembroke Place, Liverpool, L5 3QA, UK; tel: +44 7985431005 (UK), +254 702126188 (Kenya); email:  
52  
53 [Penelope.Phillips-Howard@lstm.ac.uk](mailto:Penelope.Phillips-Howard@lstm.ac.uk)  
54  
55  
56  
57  
58  
59  
60

1  
2  
3 **Keywords** menstrual hygiene management, menstrual cups, hygiene, *Staphylococcus aureus*, toxic shock  
4  
5 syndrome, *Escherichia coli*, Kenya  
6  
7  
8  
9

10 **Word count: 3976**  
11  
12

### 13 **Abstract**

14  
15 Objective: Examine the safety of menstrual cups against sanitary pads and usual practice in Kenyan  
16  
17 schoolgirls.  
18  
19

20  
21 Design: Observational studies nested in a cluster randomized controlled feasibility study  
22  
23

24 Setting: 30 primary schools in a health and demographic surveillance system (HDSS) in rural western  
25  
26 Kenya.  
27

28 Participants: Menstruating primary schoolgirls 14 -16 years(y) participating in a menstrual feasibility  
29  
30 study.  
31  
32

33 Interventions: Insertable menstrual cup, monthly sanitary pads, or 'usual practice' (controls).  
34  
35

36 Outcome measures: *Staphylococcus aureus* vaginal colonization, *Escherichia coli* growth on sampled  
37  
38 used cups, toxic shock syndrome or other adverse health outcomes.  
39

40 Results: Among 604 eligible girls tested, no adverse event or TSS was detected over median 10.9 months  
41  
42 follow-up. *S aureus* was 10.8%, with no significant difference over intervention time or between groups.  
43  
44 Of 65 *S aureus* positives at first test, 49 girls were retested and 10 (20.4%) remained positive. Of these,  
45  
46 2(20%) sample isolates tested positive for TSST-1; both were girls provided pads and were clinically  
47  
48 healthy. Nine percent of cups required replacements for loss, damage, dropping in latrine or a poor fit.  
49  
50 Of 30 used cups processed for *E coli* growth, 13 (37.1%, 95% CI 21.1%-53.1%) had growth. *E coli* growth  
51  
52 was greatest in newer compared with established users (53% vs 22.2%, p=0.12).  
53  
54  
55  
56  
57  
58  
59  
60

1  
2  
3 Conclusions: Among this feasibility sample, no evidence emerged to indicate menstrual cups are  
4 hazardous or cause health harms among rural Kenyan schoolgirls but large-scale trials and post-  
5 marketing surveillance should continue to evaluate cup safety.  
6  
7  
8  
9

10  
11  
12 **Strengths and limitations of the study:**  
13

- 14  
15 1. In the small sample of girls followed, there was no evidence of health harms use.  
16  
17 2. Evaluation of the safety of menstrual products, including laboratory investigations, was feasible  
18 among adolescent schoolgirls in a LMIC setting.  
19  
20 3. Logistical limitations prevented 'before' and 'after' prevalence surveys.  
21  
22 4. To minimize possible health risks, girls were trained on how to use and clean menstrual cups, and  
23 girls in all arms were provided soap for handwashing, with follow-up by nurses, creating improved  
24 hygiene circumstances for cup use in this LMIC setting.  
25  
26  
27  
28  
29  
30  
31  
32  
33  
34  
35  
36  
37  
38  
39  
40  
41  
42  
43  
44  
45  
46  
47  
48  
49  
50  
51  
52  
53  
54  
55  
56  
57  
58  
59  
60

## Introduction

The inadequate management of adolescent girls' menstruation in low and middle-income countries (LMIC) has recently emerged as an important priority for international action (1-5). Due to logistical and cost barriers, these females may manage menstruation with non-absorbent, unhygienic and uncomfortable materials (6-9). Studies in southern Asia and Africa report such items are associated with genital infections although these are seldom clinically verified (10-12), preventing understanding of women's needs to minimize such risks (2, 6-8, 13). Meanwhile a growing body of pilot studies have embarked on testing the value of menstrual hygiene products such as sanitary pads (14-16), and menstrual cups (17-22), for girls and women in resource-poor settings.

While menstrual cups have not been associated with an increased risk of reproductive tract and urogenital infections in women in high income countries (23-28), research on the safety of menstrual cups among girls (17, 19, 21) and women (18, 20) in LMIC have relied on self-reported information with no clinical or laboratory confirmatory studies. There is concern an insertable menstrual item may increase the risk of infections, particularly *Staphylococcus aureus*, leading to menstrual toxic shock syndrome (mTSS) (29). Tampons are linked to mTSS in women of reproductive age. Surveillance data for the period 1979 to 1996 indicates 5,296 cases were reported in women in the USA using highly absorbent tampons (30). The tampons were found to have been associated with vaginal micro-trauma arising from the high absorbency (27, 30-33). Menstrual cups, however, collect blood are non-absorptive, and do not disrupt the vaginal epithelium (27, 28, 31, 32). Further, among women using female barrier methods, which similarly uses medical grade silicone or latex products, mTSS is very low (~2.25 cases per 100 000 users per year) (34). Nevertheless, concern remains about any vaginal intrusion (29, 35, 36), particularly among girls (37), with poor water, hygiene and sanitation (WASH) facilities (38).

1  
2  
3 Further laboratory and field-based studies are thus needed to clarify risks associated with menstrual  
4 products, to better define the cost-benefit of subsidized provision for girls in LMIC. This paper describes  
5 the exploration of cup safety during a randomized controlled pilot feasibility study among adolescent  
6 schoolgirls in rural Kenya (39).  
7  
8  
9  
10  
11  
12

## 13 14 15 **METHODS**

### 16 17 18 19 **Study site and population**

20  
21 The study site is within the health and demographic surveillance system (HDSS) of the Kenya Medical  
22 Research Institute (KEMRI) and CDC research station in Siaya County, a rural district in the former  
23 Nyanza Province, in western Kenya (40). The population of the HDSS site approximates 230,000  
24 individuals in a ~700km<sup>2</sup> area, with adolescent girls aged 15-19 years comprising ~11% of the female  
25 population (40). The area is served by one district hospital providing tertiary care, and 10 local health  
26 clinics within the HDSS area. A second district hospital is sited in Kisumu, 40km from the study site. The  
27 KEMRI and CDC collaborative research station has on site laboratories certified for clinical trials and  
28 quality control procedures.  
29  
30  
31  
32  
33  
34  
35  
36  
37  
38  
39  
40  
41  
42

### 43 44 **Menstrual solutions (Ms) study**

45 The Ms Study was a cluster randomized controlled 3-arm 'proof of concept' feasibility study conducted  
46 in Gem, a sub-area within the HDSS (39). Of 71 primary schools in Gem, 62 agreed to participate in a  
47 baseline water sanitation and hygiene (WASH) assessment. Of these, 30 reached the pre-defined WASH  
48 threshold (presence of water in school on the day of WASH visit, availability of separate latrine bank for  
49 girls, and a pupil-latrines ratio of 70:1 or less) described in detail elsewhere (38). All girls in the 30 study  
50 schools were eligible if they were aged 14-16y, had experienced 3 menses, were resident in the HDSS for  
51  
52  
53  
54  
55  
56  
57  
58  
59  
60

1  
2  
3 at least 4 months, and attended a study school (figure 1) (39). A sample of 185 girls/arm was estimated  
4  
5 to offer 5% precision for the primary outcome, (school dropout) if this occurred in 15% of the control  
6  
7 arm (39). Recruitment of 250 girls (10 schools, average of 25 girls per school) was scheduled to allow for  
8  
9 a design effect of 1.25 and 7.5% loss to follow-up. Girls were enrolled from August 15, 2012 to August  
10  
11 27, 2013 and followed until November 21, 2013, with a median (IQR) follow-up time of 10.9 (6.1-12.5)  
12  
13 months. Further details of the overall study methods are published elsewhere.(39)  
14  
15

### 16 17 **Menstrual products and hygiene**

18  
19 Girls in the menstrual cup group were provided with one menstrual cup (Mooncup®), size B for  
20  
21 nulliparous women, or size A for those who had given birth (figure 2). This brand was selected because it  
22  
23 has been tested internationally (26, 41), was registered by the US Food and Drug Administration, and by  
24  
25 the Kenyan Pharmacy and Poisons Board for pilot testing among schoolgirls in Nairobi (19). Cups are  
26  
27 made of high grade medical silicone with material continuous without edges (25). When inserted into  
28  
29 the vagina it collects ~30 ml of menstrual blood, lasting 4-8 hours before emptying is required, according  
30  
31 to manufacturer. Girls in the cup group were given instruction on how to insert, remove and clean the  
32  
33 cup. Girls in the sanitary pad arm were each given 2 packs (total 16 pads) monthly of *Always*®, a brand  
34  
35 available in Kenya. Girls in the usual practice group continued using traditional materials such as cloths,  
36  
37 bedding or paper (2, 22) or sanitary pads. All participating girls, regardless of study arm, received a  
38  
39 lesson on menstrual hygiene by study nurses, including hand-washing and how to wipe after defecation,  
40  
41 and provision of bar soap for hand hygiene throughout the study. Schools separately received soap  
42  
43 detergent to support pupils' hand-washing in school.  
44  
45  
46  
47  
48  
49  
50

### 51 **Safety monitoring**

52  
53 Safety monitoring components comprised routine nurse-based screening and population-based  
54  
55 monitoring (figure 3), and clinical evaluation of infection with laboratory confirmation.  
56  
57  
58  
59  
60

### *Nurse screening and population based monitoring*

Following a meeting with the girls and parents, each family was provided with information leaflets which included signs and symptoms of mTSS, where they could seek emergency care, and contact information. Possible mTSS was monitored through school and community pathways. Study nurses screened each participant routinely twice per term, asking girls about comfort of the product, use, and any health concerns including questioning of mTSS signs and symptoms. This was supplemented by nurse visits to their designated target schools 1-2 times a week, allowing examination of any participant complaining of any signs or symptoms that could be mTSS or another infection or harm. A focal point teacher designated by girls in each school was provided credit for her phone to communicate with nurses between visits, if necessary. Field staff were informed of all girls participating in the study who resided in their designated village. All participants and their families were provided contact details of the field staff in their village, in case they wished to contact them in the event of a febrile episode or any other symptoms that could have been mTSS. The field staff were provided contact information for the study nurses and research team, and could support immediate evacuation to tertiary care facilities if required.

The hospitals and health facilities in the study area were provided with leaflets on clinical signs and symptoms of mTSS. Consultant obstetrician and gynecologists in tertiary care facilities were involved with the study, and were prepared to accept any mTSS referral cases over the study duration. At the end of the study, nurses visited all health facilities in the study area to recheck registry records as a precaution against any case missed by our monitoring procedures. The study data manager reviewed the HDSS database for deaths of any study participants on a monthly basis, and completed a summary check at study end to enumerate and confirm if any deaths had occurred or been missed from the monthly surveillance checks.



### *Vaginal swabbing to evaluate the prevalence of S aureus*

Assenting girls in all groups were invited to have a vaginal swab to examine the prevalence of *S aureus* colonization between January and September 2013. After piloting the procedure, each nurse facilitated the *S aureus* study in her schools, training the girls on the self-swabbing procedure (42). The self-collected vaginal swab (BBL Culture swab, COPLAN for Becton Dickinson) was conducted by girls in a school bathroom or private room. Participants were taught to insert the swab into the endocervical canal and stop when the tip was no longer visible. As instructed, the girls would then rotate the swab 3-5 times inside the vagina, withdraw it but avoid contact with vaginal surfaces, and put the swab in the tube (containing Ames transport media with agar), break the handle of the swab and close the tube tightly. Swabs were not taken during menstruation (29, 42-44). The girl gave the vaginal swab to the nurse who checked it was moist/discolored before placing it in a vial containing Amies transport medium with agar (Becton Dickinson Microbiology Systems). Each vial was labeled individually with the girls' unique study code, and placed in a cool box packed with frozen ice packs, and shipped to the KEMRI laboratories for isolation and phenotypic identification of *S aureus* and TSST-1 production. Swabs were transported on the same day, within 6 hours of collection, to the KEMRI laboratory, and stored at -70°C to -80°C before testing.

### *Swab analysis for S aureus*

Laboratory staff were masked to girls' allocated menstrual product. Each vaginal swab was processed as per protocol (27, 29). Swabs were streaked for isolation onto a mannitol salt agar plate and on tryptic soy agar with 5% sheep blood. All plates were incubated at between 36°C-37°C for 24 hours in air. After incubation, colony types were visualized for characteristic morphology of *S aureus*. Colonies were enumerated, isolated on plates containing tryptic soy agar and incubated for 24 hours at between 36°C-

1  
2  
3 37 °C. Gram staining, a catalase test, and a slide and tube coagulase test were performed to  
4  
5 phenotypically identify *S aureus*.  
6  
7

#### 8 9 10 *Detection of TSST-1 among S aureus positive girls*

11  
12 This required a second (repeat) positive swab taken from girls found positive in the main prevalence  
13 survey. Repeat swabs from *S aureus* positive girls were processed as above, examined again for  
14 presence of *S aureus*. After positive identification as *S aureus* via culture (required for TSST-1 testing),  
15 isolates were placed in sterile (16- by 150-mm) glass tubes containing 5 ml of brain heart infusion broth  
16 (Becton Dickinson), and tubes were mixed end over end for 18-24 h at 36°C- 37°C in a shaking incubator.  
17 Samples were pelleted by centrifugation (900g for 20 minutes at 4° C) and the supernatant placed into  
18 micro centrifuge tubes. The Toxic Shock Test- Reverse Passive latex Antigen (TST-RPLA) agglutination  
19 test for the detection of TSST-1 in the culture fluid supernatant of the cultured *S aureus* was tested using  
20 the staphylococcal test kit (TD0940A).  
21  
22  
23  
24  
25  
26  
27  
28  
29  
30  
31  
32  
33  
34  
35

#### 36 *Menstrual cup screening for E.coli contamination*

37  
38 Data from all girls receiving cups were assessed and 1:4 cups were randomly selected stratified by  
39 duration of provision, excluding girls who had received a replacement. Randomly selected participants  
40 were traced and asked if they were willing to swap their existing cup for a new one, to allow laboratory  
41 examination of their cup. Each used cup was placed in a separate lock-bag which was labeled with girls'  
42 study code, and transported to the laboratory and tested for *E coli* growth. Each cup was swabbed using  
43 polyester tipped swab moistened in normal saline and inoculated into both MacConkey (MAC) agar and  
44 onto blood agar (BA) and incubated for 18-24 h at 37°C. After incubation, colony types were visualized  
45 for characteristic morphology of *E coli* from the MAC plates, and subjected to indole testing. The  
46 colonies generated which were indole positive were classified using standard terminology as suspected  
47  
48  
49  
50  
51  
52  
53  
54  
55  
56  
57  
58  
59  
60

1  
2  
3 *E coli* (45). Laboratory outcomes were analyzed by study arm, into proportion positive, with 95%  
4  
5 confidence limits.  
6  
7

#### 8 9 10 *Data analysis*

11  
12 Participant characteristics gathered through girls' self-completed surveys on notebooks, intervention  
13  
14 implementation by date of provision and duration of follow-up by study nurses, and laboratory results  
15  
16 were aggregated by participant ID, and prevalence values analyzed using SPSS version 21.0. The  
17  
18 prevalence of *E coli* on cups was calculated with 95% confidence intervals (CI). Means and medians were  
19  
20 calculated with corresponding standard deviations (SD) and the interquartile range (IQR). Significant  
21  
22 differences in prevalence and linear trends were tested using chi-squared.  
23  
24

#### 25 26 **RESULTS**

27  
28 Of 1005 girls in the 30 study schools in eligible classes, 199 (19.8%) were ineligible, 40 (5.0%) girls  
29  
30 refused, and 15 (1.8%) migrated before intervention (figure 1). Of the 751 receiving intervention, 11  
31  
32 were pregnant prior to intervention, and 96 (12.8%) were lost-to-follow-up providing 644 girls for  
33  
34 outcome evaluation. (39) Of these, 604 contributed toward the population surveyed for *S aureus*, and 40  
35  
36 girls were not swabbed (18 had dropped out and 22 were absent at time of survey).  
37  
38

#### 39 40 41 42 *Participant characteristics*

43  
44 The mean (SD) age of participants at enrolment was 14.6 (0.7) years, and mean age at menarche was  
45  
46 13.6 (0.9) years (table 1). Menses lasted a mean of 3.8 (1.3) days; with most girls (82.6%) reporting they  
47  
48 had ever used pads, but none used tampons or menstrual cups. A quarter reported having ever had sex,  
49  
50 there were 4 pregnancies and 12 stated they were married.  
51  
52

#### 53 54 55 56 *Morbidity and mortality surveillance*

1  
2  
3 No symptoms of mTSS were identified during nurse screening or reported through village recorders. No  
4 cases of mTSS were identified or referred to tertiary care facilities. The health clinic records review  
5 identified no participants attending health services for febrile episodes or any other symptom of mTSS.  
6  
7 HDSS census review monthly and at end study identified no deaths among our study participants. At  
8 nurse routine screening, 10 girls (5 pads, 5 cups) reported heavy bleeding, 80% of whom had reported  
9 this pre-intervention. These girls were referred for tertiary care facilities, where the consultant  
10 gynecologist reported no abnormal findings, but provided hematinics.  
11  
12  
13  
14  
15  
16  
17  
18  
19  
20

#### 21 *Staph aureus prevalence survey*

22 Of 604 vaginal swabs collected among eligible participants, *S aureus* was detected in 65 (10.8%) samples  
23 (table 2). When stratified by duration of intervention, *S aureus* prevalence was 13.0% in the first  
24 intervention month, with no statistically significant trend between groups (10.5% cups, 13.6% pads,  
25 15.2% controls;  $\chi^2$  linear trend=0.34, p=0.56). Prevalence during intervention follow up, after a median  
26 of 4 months (range 2-11 months) was 10.2% with no significant trend between groups (9.4% cups, 10.7%  
27 pads, 10.5% controls;  $\chi^2$  linear trend=0.09, p = 0.76). There was no significant difference in prevalence  
28 between early intervention and during use, overall or within groups (table 2).  
29  
30  
31  
32  
33  
34  
35  
36  
37  
38  
39  
40  
41  
42  
43

#### 44 *Toxic shock syndrome toxin (TSST)-1*

45 In the first batch of 69 participants with vaginal swabs positive for *S aureus*, 49 girls were available to  
46 collect a second swab to examine presence of TSST-1. Of these swabs, 10 (20.4%) yielded *S. aureus*.  
47 These second level swabs were immediately processed to examine the presence of TSST-1 toxin. Of  
48 these 10, two (20%) tested positive for TSST-1. Neither of these was a girl provided with a menstrual  
49  
50  
51  
52  
53  
54  
55  
56  
57  
58  
59  
60

1  
2  
3 cup; both were in the sanitary pad group. Study participants were followed up, including these two girls,  
4  
5 and found to be healthy and asymptomatic.  
6  
7  
8  
9

### 10 *Menstrual cup loss or damage*

11  
12 Of 188 girls followed to outcome, 14 (7%) girls required replacement cups; due to cup loss (3  
13  
14 participants, including one girl twice), damage (2; one burned cup when boiling, one cup eaten by rats),  
15  
16 too small (3, replaced with size A due to leaking), or dropped inside the latrine (6 cups). Examination of  
17  
18 cups during screening revealed only minor abrasions, or small damage to tail ends when cut to size.  
19  
20  
21  
22  
23

### 24 *E coli growth on used menstrual cups*

25  
26 Of 188 girls provided cups and followed to outcome, 21 dropped-out. Of the 167 non-dropouts, a  
27  
28 sampling frame was obtained from the nurse's follow-up survey database in the last study quarter. This  
29  
30 comprised 134 girls surveyed, with 33 girls missed due to non-attendance. From this sample of 134 girls,  
31  
32 a random selection of 1 in 4 cups (35, 26%) were randomly selected. No girls refused. Duration of  
33  
34 provision was used to stratify the 35 cups, with 17 representing new cup users provided cups for less  
35  
36 than 6 months, and 18 established cup users provided for 6 months or longer (table 3). Five unused cups  
37  
38 acted as controls. Of the 40 cups processed, there was no *E coli* on control cups, while 13 of 35 used  
39  
40 cups had growth (37.1%, 95% CI 21.1%-53.1%; table 2). By duration of cup provision, the prevalence of *E*  
41  
42 *coli* growth generated was greatest in newer users, with growth on 9 of 17 (53%, 95% CI 29.3%-76.7%)  
43  
44 compared with 4 in 18 (22.2%, 95% CI 2.9%-41.1%) cups of established users, a difference of 31%  
45  
46 (p=0.12). Examination of *E coli* growth by girls' age, socio-economic status, reported ever used pads, age  
47  
48 at menarche, duration of bleeding, and if periods were reported to be heavy, only found an association  
49  
50 with heavy periods; 61.5% of girls reporting heavy periods had *E.coli* on cups, compared with 22.7% of  
51  
52 those stating they did not have heavy periods (p=0.022).  
53  
54  
55  
56  
57  
58  
59  
60

## DISCUSSION

We observed 10.8% prevalence of *S aureus* in 14-16 year-old girls in this area. This is at the lower range of the 10%–20% vaginal carriage rate reported in the general population in high income countries (29, 46). We found no statistical difference in the prevalence of *S aureus* detected at first introduction and during intervention with cups and pads, with no significant difference between study groups. No cases of mTSS were detected and TSST-1 was not found among girls using cups with laboratory confirmed *S aureus* colonization. No harms were detected although *E coli* was grown on a third of used cups.

To our knowledge, no other studies have evaluated the safety of menstrual products among schoolgirls in LMIC settings. This study demonstrated the feasibility of such evaluations, and that testing laboratory evaluations can be conducted to ensure rigor. However, as a feasibility study, a number of limitations are evident. For logistic reasons we were unable to conduct complete sampling for a ‘before’ and ‘after’ *S aureus* prevalence survey. While sampling at different stages may have introduced bias, we detected no difference in prevalence between girls sampled early during intervention, compared with later or between study groups, and the point prevalence remained within the ‘expected’ range (47). Only a small proportion of *S aureus* positives were identified positive on second testing, leaving few (10) samples for isolation of TSST-1, preventing analysis of risk factors. *S aureus* was only detected in 20% of girls who had been positive at first screening, when swabbing was repeated. Transience is a recognized phenomenon in vaginal carriage, with higher persistence in nasal than vaginal carriage (47). Colonization also varies according to the time of the menstrual cycle due to altered levels of iron, pH, oxygen, carbon dioxide, redox potential, and/or osmolarity (29, 48, 49). While we found no adverse events among the participants followed, 10% of girls migrated out of the study area. The HDSS system allowed us to visit

1  
2  
3 all homes with no cases of TSS reported from these families. We assessed all health clinic registers,  
4 reviewing girls by name, and no TSS cases were found. If a girl was registered under a different name we  
5 would have missed this, however, no cases of mTSS were diagnosed, and our HDSS census identified no  
6 study participant had died. We note, however, mTSS is rare and our population studied was small. We  
7 used indole test to generate *E coli* growth (45); confirmatory tests would more accurately assess  
8 contamination risk of *E coli* (50), which we assume would have been equally distributed across groups  
9 stratified by time. We did not consider evaluating *E coli* on pads or cloths, which in hind-sight may have  
10 provided an important comparison.  
11  
12  
13  
14  
15  
16  
17  
18  
19  
20  
21

## 22 Interpretation

23  
24 Studies in high income countries have shown menstrual cups to be safe and effective. Post marketing  
25 surveillance of over 100 million soft menstrual cup users, and examination of vaginal pH and microflora,  
26 urinalysis, pap smears, and colposcopy in 406 subjects using cups for 3 months found no evidence of  
27 adverse effects among menstrual cup users (28). One study examined whether menstrual cups act as a  
28 fomite for *S aureus* or are conducive to contamination with TSST-1; no association was found (27). Our  
29 surveillance did not detect mTSS among participants using menstrual cups or other menstrual care  
30 items. mTSS is a rare condition with a risk of 1-16 cases per 100,000 women years and has a lower  
31 mortality than non-menstrual TSS, it may still be life threatening (51). Menstrual TSS requires vaginal  
32 colonization with a toxin-producing strain of *S. aureus* in the vagina during menstruation, in the absence  
33 of a positive antibody (titer of 1:32) (47). TSST-1 is a super antigen, causing an exaggerated release of  
34 inflammatory cytokines responsible for the symptoms of clinical disease (47). It is believed that mTSS  
35 develops from a site of colonization rather than from infection (29, 36). In our study TSST-1 toxin was  
36 detected in two of ten *S aureus* isolates, a prevalence of 20% in girls with persistent *S aureus*, similar to  
37 the range detected in other studies (52-54). The two girls, both in the sanitary pad arm with no access to  
38  
39  
40  
41  
42  
43  
44  
45  
46  
47  
48  
49  
50  
51  
52  
53  
54  
55  
56  
57  
58  
59  
60

1  
2  
3 menstrual cups, were healthy and did not exhibit any sign or symptom of mTSS. Other studies have  
4  
5 shown the presence of TSST-1 detected among healthy individuals with protective antibody titers (>100)  
6  
7 (55). One case of mTSS has been reported in Canada in a woman with Hashimoto thyroiditis, an  
8  
9 autoimmune disease, within 10 days of her first cup use (56). Further surveillance of mTSS among users  
10  
11 is thus warranted.  
12  
13

14  
15  
16  
17 *E coli* growth was detected on a third of cups, with the greatest proportion among girls who had been  
18  
19 allocated cups within 6 months. Separate questioning of girls revealed dropping of cups occurred more  
20  
21 frequently in early use (57). Inexperienced girls reported difficulty changing and emptying in school  
22  
23 where locks were absent from latrine doors, and conditions were cramped and unlit with the stress of  
24  
25 other girls waiting outside to use the latrine (57). School eligibility required a threshold of 70 pupils or  
26  
27 less per latrine, separate toilets for girls, and water observed at baseline in this study (38). We note in a  
28  
29 separate paper that hand-washing was reported more commonly among girls using cups than the other  
30  
31 groups, suggesting nurse training and caution about cup hygiene was understood by girls (58). However,  
32  
33 other studies show girls' inability to adequately clean themselves after defecation, resulting in vaginal  
34  
35 contamination with ten different micro-organisms including *E coli* (59). However, we were unable to also  
36  
37 swab girls to assess presence of vaginal *E.coli*, and thus cannot infer that *E.coli* on cups would be  
38  
39 associated with vaginal *E coli*. Our research supported hygienic use of all menstrual products, with  
40  
41 intense monitoring of all participants over time. We recommend further studies examining the vaginal  
42  
43 microbiome among menstrual cup users, include vaginal *E coli*, as a study reported an association  
44  
45 between vaginal *E.coli* and low birth weight (60). We thus offer caution to programmes embarking on  
46  
47 menstrual cup or pad distribution to ensure adequate safety procedures, including information,  
48  
49 education, and communication are provided to girls, and support of WASH infrastructure in their schools  
50  
51  
52  
53  
54  
55  
56  
57  
58  
59  
60



1  
2  
3 (61). Similarly, we note provision of hygiene supplies and follow-up of nurses improved the hygienic  
4  
5  
6 circumstances for cup use in this LMIC setting.  
7  
8  
9

## 10 **CONCLUSIONS**

11  
12  
13  
14 To our knowledge, no studies have evaluated the safety of menstrual products used by schoolgirls in  
15  
16 LMIC. In this study, we did not detect harms associated with menstrual cups use among adolescent  
17  
18 schoolgirls in this rural African setting. The vaginal colonization rate of *S aureus* was within the range of  
19  
20 published data, and similarly we observed only a 20% rate of TSST-1 among girls with persistent *S aureus*  
21  
22 colonization, with no direct association with menstrual cups. Further studies such as large scale trials  
23  
24 and post-marketing surveillance is recommended to verify findings from this feasibility study. Studies  
25  
26 are required to further strengthen methodological approaches used in LMICs. Presence of *E coli* grown  
27  
28 on a quarter of sampled cups and higher rates among new users, despite substantive education by study  
29  
30 nurses, suggests hygiene education and WASH infrastructures in schools needs to be strengthened (62,  
31  
32 63), and cup provision requires a strong educational component.  
33  
34  
35  
36  
37  
38  
39

## 40 **Acknowledgements**

41  
42 We thank the schools, girls, staff, and stakeholders contributing to this study, funded by the Joint Global  
43  
44 Health Trials of the UK Medical Research Council, the Department for International Development, and  
45  
46 the Wellcome Trust; we thank Mooncups Ltd for providing cups at a discounted price, and the Director  
47  
48 of KEMRI for approving the manuscript. The findings and conclusions of this report are those of the  
49  
50 authors and do not necessarily represent the official position of the Centers for Disease Control and  
51  
52 Prevention.  
53  
54  
55  
56  
57  
58  
59  
60

### Disclosure of interest

Authors confirm no conflict of interest exist.

### Authors Contributions

JJO, LA, CaO, and COO carried out the experiments. EN, KO, JO conducted the field work. JO, EN, PPH and KFL coordinated clinical follow-up. PPH, and CIO performed the statistical analysis. PPH, LM, COO, KA, BF and KFL conceived the study, participated in the design and coordination, and drafted the manuscript. All authors read and approved the final manuscript.

### Ethical approval

The study was approved by KEMRI's National Ethical Review Committee (Ethics number: 2198), and the Liverpool School of Tropical Medicine's Ethics Committee (Ethics number: 12.11). The Institutional Review Board of the US Centers for Disease Control and Prevention approved a non-engaged waiver. Written informed consent and assent from parents and girls, respectively, were required for participation.

### Funding

This study was funded by the UK Medical Research Council/Department for International Development/Wellcome Trust (Joint Global Health) Trials award scheme (G1100677/1).

### References

1. Sommer M. Where the education system and women's bodies collide: The social and health impact of girls' experiences of menstruation and schooling in Tanzania. *J Adolesc.* 2010;33(4):521-9.

- 1  
2  
3 2. Mason L, Nyothach E, Alexander K, Odhiambo FO, Eleveld A, Vulule J, et al. 'We keep  
4 it secret so no one should know' - a qualitative study to explore young schoolgirls attitudes and  
5 experiences with menstruation in rural Western Kenya. PLoS One. 2013;8(11):e79132.  
6  
7
- 8  
9 3. Sahin M. Guest editorial: tackling the stigma and gender marginalization related to  
10 menstruation via WASH in schools programmes. Waterlines. 2015;34(1).  
11  
12
- 13 4. Phillips-Howard PA, Otieno G, Burmen B, Otieno F, Odongo F, Odour C, et al.  
14 Menstrual Needs and Associations with Sexual and Reproductive Risks in Rural Kenyan  
15 Females: A Cross-Sectional Behavioral Survey Linked with HIV Prevalence. J Womens Health  
16 (Larchmt). 2015;24(10):801-11.  
17  
18
- 19 5. Sommer M, Caruso BA, Sahin M, Calderon T, Cavill S, Mahon T, et al. A Time for  
20 Global Action: Addressing Girls' Menstrual Hygiene Management Needs in Schools. PLoS Med.  
21 2016;13(2):e1001962.  
22  
23
- 24 6. Sumpter C, Torondel B. A systematic review of the health and social effects of menstrual  
25 hygiene management. PLoS One. 2013;8(4):e62004.  
26  
27
- 28 7. Das P, Baker KK, Dutta A, Swain T, Sahoo S, Das BS, et al. Menstrual Hygiene  
29 Practices, WASH Access and the Risk of Urogenital Infection in Women from Odisha, India.  
30 PLoS One. 2015;10(6):e0130777.  
31  
32
- 33 8. El-Gilany AH, Badawi K, El-Fedawy S. Menstrual hygiene among adolescent schoolgirls  
34 in Mansoura, Egypt. Reprod Health Matters. 2005;13(26):147-52.  
35  
36
- 37 9. Baisley K, Changalucha J, Weiss HA, Mugeye K, Everett D, Hambleton I, et al. Bacterial  
38 vaginosis in female facility workers in north-western Tanzania: prevalence and risk factors. Sex  
39 Transm Infect. 2009;85(5):370-5.  
40  
41  
42  
43  
44  
45  
46  
47  
48  
49  
50  
51  
52  
53  
54  
55  
56  
57  
58  
59  
60

- 1  
2  
3 10. Dasgupta A, Sarkar M. Menstrual Hygiene: How Hygienic is the Adolescent Girl? Indian  
4  
5 J Community Med. 2008;33(2):77-80.  
6  
7
- 8 11. Shah SP, Rajesh N, Shah PP, Modi DK, Desai SA, Lata D. Improving quality of life with  
9  
10 new menstrual hygiene practices among adolescent tribal girls in rural Gujarat, India.  
11  
12 Reproductive Health Matters. 2013;21(41):205-13.  
13  
14
- 15 12. Fehr A. Stress, menstruation and school attendance: effects of water access among  
16  
17 adolescent girls in south Gondar, Ethiopia. Atlanta, GA: Emory University; 2011.  
18  
19
- 20 13. Sommer M, Caruso B, Mahon T, Phillips-Howard P, editors. The impact of sub-optimal  
21  
22 water, sanitation (WaSH) and menstrual hygiene management (MHM) on health and gender  
23  
24 equity: use of scientific evidence to define priorities. Symposium 24, p 108. In: Annual Meeting  
25  
26 Program. The American journal of tropical medicine and hygiene; 2014 November 1, 2014; New  
27  
28 Orleans: ASTMH.  
29  
30
- 31 14. Montgomery P, Ryus CR, Dolan CS, Dopson S, Scott LM. Sanitary pad interventions for  
32  
33 girls' education in Ghana: a pilot study. PLoS One. 2012;7(10):e48274.  
34  
35
- 36 15. Crofts T, Fisher WA. Menstrual Hygiene in Ugandan Schools and investigation of low-  
37  
38 cost sanitary pads. Journal of Water, Sanitation and Hygiene for Development 2012;2:50-8.  
39  
40
- 41 16. Garg R, Goyal S, Gupta S. India moves towards menstrual hygiene: subsidized sanitary  
42  
43 napkins for rural adolescent girls - issues and challenges. Maternal and Child Health Journal.  
44  
45 2012;16:767-74.  
46  
47
- 48 17. Oster E, Thornton R. Menstruation, Sanitary Products and School Attendance: Evidence  
49  
50 from a Randomized Evaluation. Am Econ J: Appl Economics. 2011;3(1):91-100.  
51  
52  
53  
54  
55  
56  
57  
58  
59  
60

- 1  
2  
3  
4  
5  
6  
7  
8  
9  
10  
11  
12  
13  
14  
15  
16  
17  
18  
19  
20  
21  
22  
23  
24  
25  
26  
27  
28  
29  
30  
31  
32  
33  
34  
35  
36  
37  
38  
39  
40  
41  
42  
43  
44  
45  
46  
47  
48  
49  
50  
51  
52  
53  
54  
55  
56  
57  
58  
59  
60
18. Beksinska ME, Smit J, Greener R, Todd CS, Lee ML, Maphumulo V, et al. Acceptability and performance of the menstrual cup in South Africa: a randomized crossover trial comparing the menstrual cup to tampons or sanitary pads. *J Womens Health (Larchmt)*. 2015;24(2):151-8.
19. APHRC. Policy Brief: Attitudes towards, and acceptability of, menstrual cups as a method for managing menstruation. Nairobi: African Population and Health Research Center; <https://www.aphrc.org/download/?id=4> (accessed 1st June 2013), 2010 November 2010. Report No.
20. Averbach S, Sahin-Hodoglugil N, Musara P, Chipato T, van der Straten A. Duet for menstrual protection: a feasibility study in Zimbabwe. *Contraception*. 2009;79(6):463-8.
21. Tellier M, Hyttel M, Glad M. Assessing acceptability and hygienic safety of menstrual cups as menstrual management methods for vulnerable young women in Uganda Red Cross Society's Life Planning Skills Project. Kampala, Uganda: 2012.
22. Mason L, Laserson K, Oruko K, Nyothach E, Alexander K, Odhiambo F, et al. Adolescent schoolgirls' experiences of menstrual cups and pads in rural western Kenya: a qualitative study. *Waterlines*. 2015;34(1):15-30.
23. Howard C, Rose CL, Trouton K, Stamm H, Marentette D, Kirkpatrick N, et al. FLOW (finding lasting options for women): multicentre randomized controlled trial comparing tampons with menstrual cups. *Can Fam Physician*. 2011;57(6):e208-15.
24. Karnaky KJ. Internal menstrual protection with the rubber menstrual cup. *Obstet Gynecol*. 1962;19:688-91.
25. Mooncups. Advice and Facts : <http://www.mooncup.co.uk/advice-centre/faqs.html> (last accessed 29 June 2014). October 25th 2011. Report No.

- 1  
2  
3 26. Stewart K, Greer R, Powell M. Women's experience of using the Mooncup. *J Obstet*  
4  
5 *Gynaecol.* 2010;30(3):285-7.  
6  
7  
8 27. Tierno PM, Hanna BA. Propensity of tampons and barrier contraceptives to amplify  
9  
10 *Staphylococcus aureus* Toxic shock syndrome toxin-I. *Infect Dis Obstet Gynecol.* 1994;2(3):140-  
11  
12 5.  
13  
14 28. North B, Oldham M. Preclinical, Clinical, and Over-the-Counter Postmarketing  
15  
16 *Experience with a New Vaginal Cup: Menstrual Collection.* *J Womens Health.* 2011;20(2).  
17  
18 29. Smith CB, Noble V, Bensch R, Ahlin PA, Jacobson JA, Latham RH. Bacterial flora of  
19  
20 the vagina during the menstrual cycle: findings in users of tampons, napkins, and sea sponges.  
21  
22 *Ann Intern Med.* 1982;96(6 Pt 2):948-51.  
23  
24  
25 30. Hajjeh RA, Reingold A, Weil A, Shutt K, Schuchat A, Perkins BA. Toxic shock  
26  
27 syndrome in the United States: surveillance update, 1979 1996. *Emerg Infect Dis.*  
28  
29 1999;5(6):807-10.  
30  
31  
32 31. Todd JK, Wiesenthal AM, Ressman M, Caston SA, Hopkins RS. Toxic shock syndrome.  
33  
34 II. Estimated occurrence in Colorado as influenced by case ascertainment methods. *Am J*  
35  
36 *Epidemiol.* 1985;122(5):857-67.  
37  
38 32. Reiser RF, Hinzman SJ, Bergdoll MS. Production of toxic shock syndrome toxin 1 by  
39  
40 *Staphylococcus aureus* restricted to endogenous air in tampons. *J Clin Microbiol.*  
41  
42 1987;25(8):1450-2.  
43  
44  
45 33. Parsonnet J, Hansmann MA, Delaney ML, Modern PA, Dubois AM, Wieland-Alter W, et  
46  
47 al. Prevalence of toxic shock syndrome toxin 1-producing *Staphylococcus aureus* and the  
48  
49 presence of antibodies to this superantigen in menstruating women. *J Clin Microbiol.*  
50  
51 2005;43(9):4628-34.  
52  
53  
54  
55  
56  
57  
58  
59  
60

- 1  
2  
3  
4  
5  
6  
7  
8  
9  
10  
11  
12  
13  
14  
15  
16  
17  
18  
19  
20  
21  
22  
23  
24  
25  
26  
27  
28  
29  
30  
31  
32  
33  
34  
35  
36  
37  
38  
39  
40  
41  
42  
43  
44  
45  
46  
47  
48  
49  
50  
51  
52  
53  
54  
55  
56  
57  
58  
59  
60
34. Schwartz B, Gaventa S, Broome CV, Reingold AL, Hightower AW, Perlman JA, et al. Nonmenstrual toxic shock syndrome associated with barrier contraceptives: report of a case-control study. *Rev Infect Dis.* 1989;11 Suppl 1:S43-8; discussion S8-9.
35. Lansdell LW, Taplin D, Aldrich TE. Recovery of *Staphylococcus aureus* from multiple body sites in menstruating women. *J Clin Microbiol.* 1984;20(3):307-10.
36. Chesney PJ, Bergdoll MS, Davis JP, Vergeront JM. The disease spectrum, epidemiology, and etiology of toxic-shock syndrome. *Annu Rev Microbiol.* 1984;38:315-38.
37. Gaventa S, Reingold AL, Hightower AW, Broome CV, Schwartz B, Hoppe C, et al. Active surveillance for toxic shock syndrome in the United States, 1986. *Rev Infect Dis.* 1989;11 Suppl 1:S28-34.
38. Alexander K, Oduor C, Nyothach E, Laserson K, Amek N, Eleveld A, et al. Water, Sanitation and Hygiene Conditions in Kenyan Rural Schools: Are Schools Meeting the Needs of Menstruating Girls? *Water.* 2014;6:1453-66.
39. Phillips-Howard P, Nyothach E, ter Kuile F, Omoto J, Wang D, Zeh C, et al. Menstrual cups and sanitary pads to reduce school attrition, and sexually transmitted and reproductive tract infections: a cluster randomised controlled feasibility study in rural western Kenya. *BMJ open.* 2016;6:e013229. <http://dx.doi.org/10.1136/bmjopen-2016-013229>.
40. Odhiambo FO, Laserson KF, Sewe M, Hamel MJ, Feikin DR, Adazu K, et al. Profile: The KEMRI/CDC Health and Demographic Surveillance System--Western Kenya. *Int J Epidemiol.* 2012;41(4):977-87.
41. Oster E, Thornton R. Determinants of technology adoption: Peer effects in menstrual cup up-take. *Journal of the European Economic Association.* 2012;10(6):1263-93.

- 1  
2  
3  
4  
5  
6  
7  
8  
9  
10  
11  
12  
13  
14  
15  
16  
17  
18  
19  
20  
21  
22  
23  
24  
25  
26  
27  
28  
29  
30  
31  
32  
33  
34  
35  
36  
37  
38  
39  
40  
41  
42  
43  
44  
45  
46  
47  
48  
49  
50  
51  
52  
53  
54  
55  
56  
57  
58  
59  
60
42. Tanksale VS, Sahasrabhojane M, Patel V, Nevrekar P, Menezes S, Mabey D. The reliability of a structured examination protocol and self administered vaginal swabs: a pilot study of gynaecological outpatients in Goa, India. *Sex Transm Infect.* 2003;79(3):251-3.
43. Hobbs MM, van der Pol B, Totten P, Gaydos CA, Wald A, Warren T, et al. From the NIH: proceedings of a workshop on the importance of self-obtained vaginal specimens for detection of sexually transmitted infections. *Sex Transm Dis.* 2008;35(1):8-13.
44. Knox J, Tabrizi SN, Miller P, Petoumenos K, Law M, Chen S, et al. Evaluation of self-collected samples in contrast to practitioner-collected samples for detection of Chlamydia trachomatis, Neisseria gonorrhoeae, and Trichomonas vaginalis by polymerase chain reaction among women living in remote areas. *Sex Transm Dis.* 2002;29(11):647-54.
45. Blazevic D, Ederer G. Principals of biochemical tests in diagnostic microbiology. New York, NY: John Wiley and Sons; 1975.
46. Guinan ME, Dan BB, Guidotti RJ, Reingold AL, Schmid GP, Bettoli EJ, et al. Vaginal colonization with Staphylococcus aureus in healthy women: a review of four studies. *Ann Intern Med.* 1982;96(6 Pt 2):944-7.
47. Parsonnet J, Hansmann MA, Seymour JL, Delaney ML, Dubois AM, Modern PA, et al. Persistence survey of toxic shock syndrome toxin-1 producing Staphylococcus aureus and serum antibodies to this superantigen in five groups of menstruating women. *BMC Infect Dis.* 2010;10:249.
48. Wagner G, Ottesen B. Vaginal physiology during menstruation. *Ann Intern Med.* 1982;96(6 Pt 2):921-3.



- 1  
2  
3  
4  
5  
6  
7  
8  
9  
10  
11  
12  
13  
14  
15  
16  
17  
18  
19  
20  
21  
22  
23  
24  
25  
26  
27  
28  
29  
30  
31  
32  
33  
34  
35  
36  
37  
38  
39  
40  
41  
42  
43  
44  
45  
46  
47  
48  
49  
50  
51  
52  
53  
54  
55  
56  
57  
58  
59  
60
49. Yarwood JM, Schlievert PM. Oxygen and carbon dioxide regulation of toxic shock syndrome toxin 1 production by *Staphylococcus aureus* MN8. *J Clin Microbiol.* 2000;38(5):1797-803.
50. Bernasconi C, Volponi G, Bonadonna L. Comparison of three different media for the detection of *E. coli* and coliforms in water. *Water Sci Technol.* 2006;54(3):141-5.
51. Todd JK. Toxic shock syndrome. *Clinical microbiology reviews.* 1988;1(4):432-46.
52. Dickgiesser N, Brombacher A. *Staphylococcus aureus* producing toxic shock syndrome toxin 1 (TSST-1) in clinical specimens and vaginal swabs in Mannheim, West Germany. *Zentralblatt für Bakteriologie, Mikrobiologie, und Hygiene Series A, Medical microbiology, infectious diseases, virology, parasitology.* 1987;265(3-4):323-9.
53. Linnemann CC, Jr., Staneck JL, Hornstein S, Barden TP, Rauh JL, Bonventre PF, et al. The epidemiology of genital colonization with *Staphylococcus aureus*. *Ann Intern Med.* 1982;96(6 Pt 2):940-4.
54. Lowy FD. *Staphylococcus aureus* infections. *N Engl J Med.* 1998;339(8):520-32.
55. Crass BA, Bergdoll MS. Toxin involvement in toxic shock syndrome. *J Infect Dis.* 1986;153(5):918-26.
56. Mitchell M, Bisch S, Arnfield S, Hosseini-Moghaddam S. A confirmed case of toxic shock syndrome associated with the use of a menstrual cup. *Can J Infect Dis Med Microbiol.* 2015;26(4):218-20.
57. Oduor C, Alexander K, Oruko K, Nyothach E, Mason L, Odhiambo F, et al. Schoolgirls' experiences of changing and disposal of menstrual hygiene items and inferences for WASH in schools. *Waterlines.* 2015;34(4):397-411.

- 1  
2  
3 58. Nyothach E, Alexander K, Oduor C, Mason L, Oruko K, Odhiambo F, et al.  
4  
5 Handwashing for menstrual hygiene management among primary schoolgirls in rural western  
6  
7 Kenya. *Waterlines*. 2015;34(4):279-95.  
8  
9  
10 59. Cemek F, Odabas D, Senel U, Kocaman AT. Personal hygiene and vulvovaginitis in  
11  
12 prepubertal children. *Journal of pediatric and adolescent gynecology*. 2015.  
13  
14  
15 60. Krohn MA, Thwin SS, Rabe LK, Brown Z, Hillier SL. Vaginal colonization by  
16  
17 *Escherichia coli* as a risk factor for very low birth weight delivery and other perinatal  
18  
19 complications. *J Infect Dis*. 1997;175(3):606-10.  
20  
21  
22 61. Alexander KT, Dreifelbis R, Freeman MC, Ojenty B, Rheingans R. Improving service  
23  
24 delivery of water, sanitation, and hygiene in primary schools: a cluster-randomized trial in  
25  
26 western Kenya. *J Water Health*. 2013;11(3):507-19.  
27  
28  
29 62. Sommer M, Sutherland C, Chandra-Mouli V. Putting menarche and girls into the global  
30  
31 population health agenda. *Reprod Health*. 2015;12(1):24.  
32  
33  
34 63. Sommer M, Sahin M. Overcoming the taboo: advancing the global agenda for menstrual  
35  
36 hygiene management for schoolgirls. *Am J Public Health*. 2013;103(9):1556-9.  
37  
38  
39  
40  
41  
42  
43  
44  
45  
46  
47  
48  
49  
50  
51  
52  
53  
54  
55  
56  
57  
58  
59  
60

1  
2  
3 **FIGURES**  
4  
5  
6  
7

8 Figure 1

9  
10 Participant flow diagram for Ms Study and *Staphylococcus aureus* survey  
11  
12  
13

14  
15 Figure 2

16  
17  
18  
19 Menstrual cup distributed to girls in cup allocated schools  
20  
21  
22  
23  
24  
25

26  
27 Figure 3

28  
29 Flow diagram for action for suspected mTSS event  
30  
31  
32  
33  
34  
35  
36  
37  
38  
39  
40  
41  
42  
43  
44  
45  
46  
47  
48  
49  
50  
51  
52  
53  
54  
55  
56  
57  
58  
59  
60

Table 1: Characteristics of study population\*

| Characteristics           | Statistics/<br>Category | Control (%)<br>(N=200) | Pads (%)<br>(N=256) | Cups (%)<br>(N=188) | Total (%)<br>(N=644) |
|---------------------------|-------------------------|------------------------|---------------------|---------------------|----------------------|
| Age in years at enrolment | Mean(SD)                | 14.6(0.7)              | 14.5(0.7)           | 14.6(0.7)           | 14.6(0.7)            |
| Age in years at menarche  | Mean(SD)                | 13.6(0.8)              | 13.7(0.8)           | 13.5(1.0)           | 13.6(0.9)            |
| Number of days menses     | Mean(SD)                | 3.7(1.2)               | 3.9(1.3)            | 3.7(1.5)            | 3.8(1.3)             |
| Experience heavy periods  | Yes                     | 41(20.5%)              | 68(26.6%)           | 39(20.7%)           | 148(23.0%)           |
| Experience period cramps  | Yes                     | 129(64.5%)             | 165(64.5%)          | 115(61.2%)          | 409(63.5%)           |
| Ever used pads            | Yes                     | 168(84.0%)             | 198(77.3%)          | 166(88.3%)          | 532(82.6%)           |
| Ever had sex ‡            | n                       | 194                    | 249                 | 183                 | 626                  |
|                           | Yes                     | 47(24.2%)              | 58(23.3%)           | 58(31.7%)           | 163(26.0%)           |
| Ever been pregnant        | n                       | 194                    | 249                 | 183                 | 626                  |
|                           | Yes                     | 0(0%)                  | 2(0.8%)             | 2(1.1%)             | 4(0.6%)              |
| Report being married      | n                       | 194                    | 249                 | 183                 | 626                  |
|                           | Yes                     | 3(1.5%)                | 4(1.6%)             | 5(2.7%)             | 12(1.9%)             |
| Duration of follow-up     | Median (IQR)            | 10.5(5.6-12.5)         | 11.4(6.7-12.5)      | 10.9(5.0-12.6)      | 10.9(6.1-12.5)       |

Abbreviations: SD: standard deviation

\* Characteristics reported by 644 participants at baseline survey (39)

‡ 626 of 644 answered questions on sex, pregnancy, and marriage; ever had sex includes girls reporting having had sexual intercourse, including those reporting tricked or forced to have sexual intercourse

Table 2 Prevalence of *Staphylococcus aureus* early and during intervention by study group

|                       | 1st month intervention | Greater than one month intervention | Total study   | $\chi^2$ | p value |
|-----------------------|------------------------|-------------------------------------|---------------|----------|---------|
| Cups                  | 4/38 (10.5)            | 13/139 (9.4)                        | 17/177 (9.6)  | 0.05     | 0.83    |
| Pads                  | 6/44 (13.6)            | 21/197 (10.7)                       | 27/241 (11.2) | 0.32     | 0.57    |
| Control               | 5/33 (15.2)            | 16/153 (10.5)                       | 21/186 (11.3) | 0.6      | 0.44    |
| Total                 | 15/115 (13.0)          | 50/439 (10.2)                       | 65/604 (10.8) | 0.77     | 0.38    |
| $\chi^2$ linear trend | 0.34                   | 0.09                                | 0.26          |          |         |
| p value               | 0.56                   | 0.76                                | 0.61          |          |         |

Table 3 *E.coli* growth generated on cups over differing time spans

|           |                           | Total cups available* | Cups randomly sampled | Proportion cups from available sample | Number with <i>E coli</i> growth | Prevalence (95% CI) |
|-----------|---------------------------|-----------------------|-----------------------|---------------------------------------|----------------------------------|---------------------|
| New       | <2m use                   | 14                    | 6                     |                                       | 3                                | 50% (10.0%-90.0%)   |
|           | 3-5m use                  | 51                    | 11                    |                                       | 6                                | 55% (25.6%-84.4%)   |
|           | All new users (<6m)       | 65                    | 17                    | 25%                                   | 9                                | 53% (29.3%-76.7%)   |
| Long term | Established (6-9m)        | 58                    | 12                    |                                       | 4                                | 33.3% (6.6%-60.0%)  |
|           | Longer-term (9m>)         | 11                    | 6                     |                                       | 0                                | 0%                  |
|           | All long-term users (6m>) | 69                    | 18                    | 26%                                   | 4                                | 22.2% (2.9%-41.1%)  |
|           |                           | 134                   | 35                    | 26%                                   | 13                               | 37.1% (21.1%-53.1%) |

\* Available population at cup-check in last study quarter

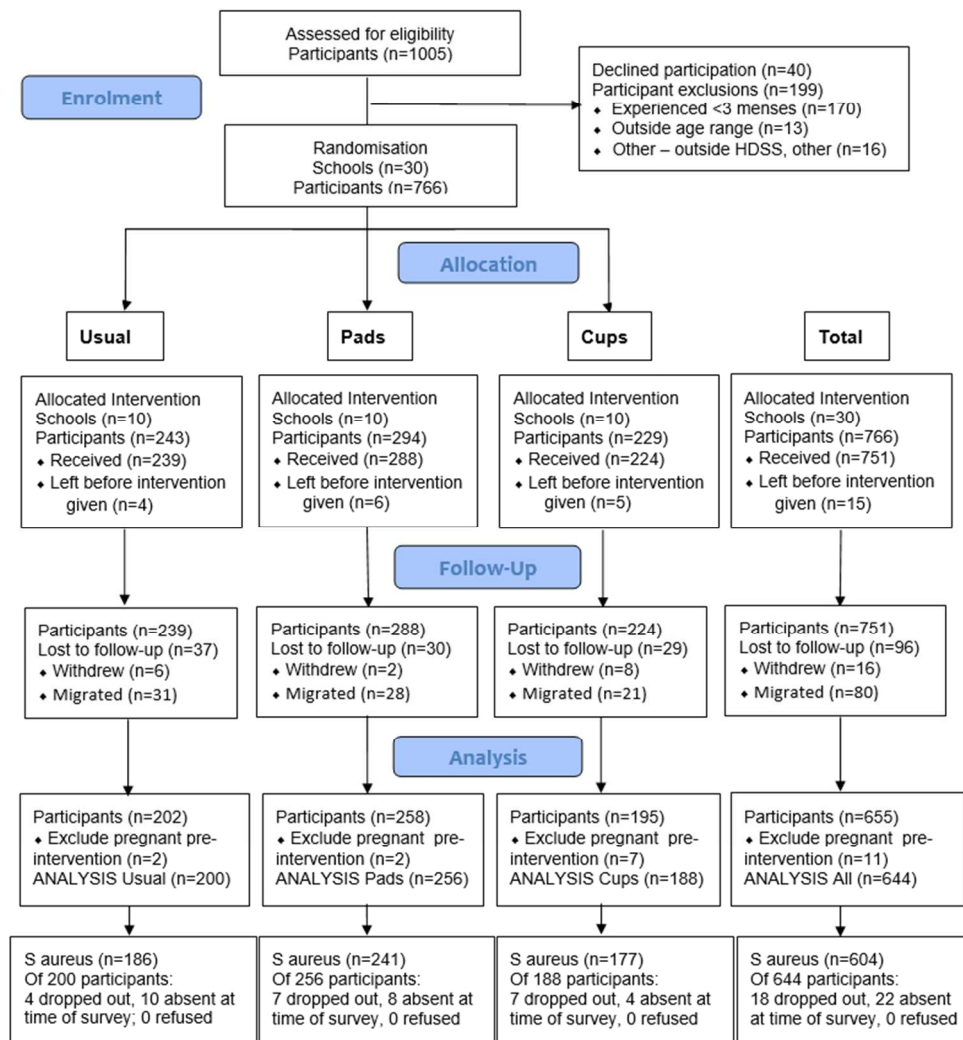

Participant flow diagram for Ms Study and Staphylococcus aureus survey figure 1

144x152mm (144 x 144 DPI)

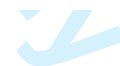

1  
2  
3  
4  
5  
6  
7  
8  
9  
10  
11  
12  
13  
14  
15  
16  
17  
18  
19  
20  
21  
22  
23  
24  
25  
26  
27  
28  
29  
30  
31  
32  
33  
34  
35  
36  
37  
38  
39  
40  
41  
42  
43  
44  
45  
46  
47  
48  
49  
50  
51  
52  
53  
54  
55  
56  
57  
58  
59  
60

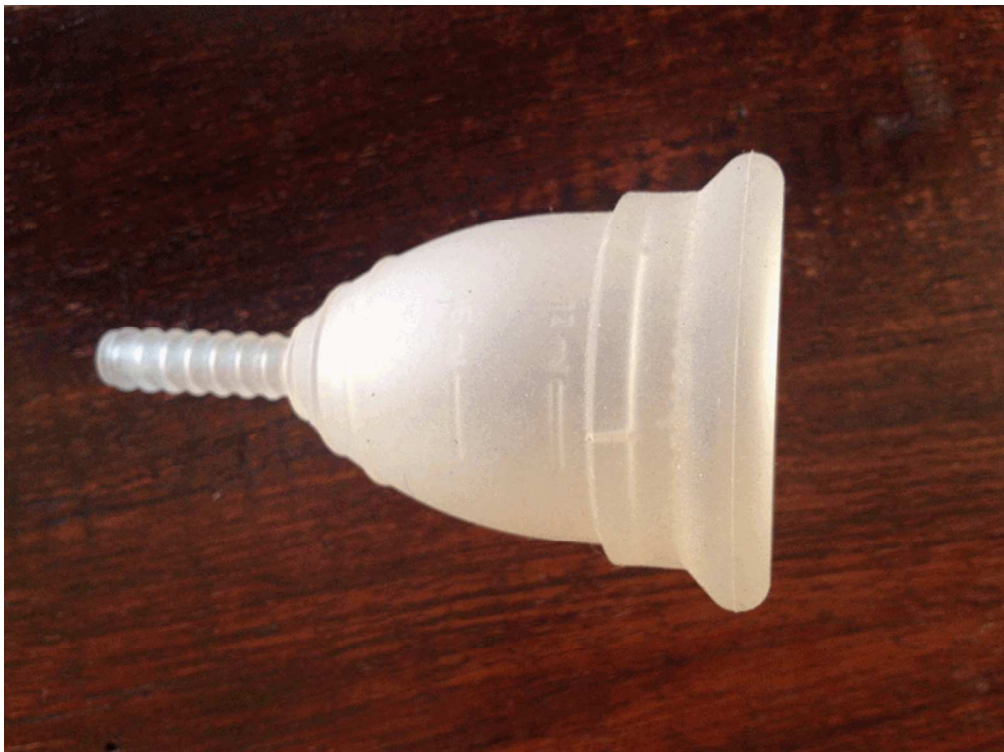

Menstrual cup distributed to girls in cup allocated schools  
figure 2  
286x214mm (72 x 72 DPI)

ew only



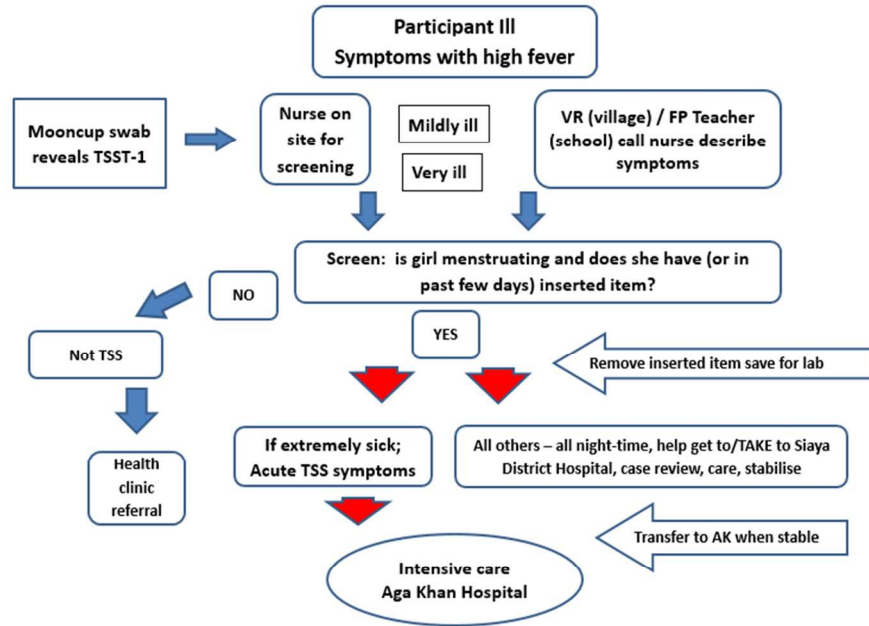

Flow diagram for action for suspected mTSS event  
figure 3  
297x220mm (72 x 72 DPI)

## STROBE Statement

**Examining the safety of menstrual cups among rural primary school girls in western Kenya: observational studies nested in a randomized controlled feasibility study**

| Section                  | #  | Checklist item                                                                                                                                                                       | Page reported |
|--------------------------|----|--------------------------------------------------------------------------------------------------------------------------------------------------------------------------------------|---------------|
| Title and abstract       | 1  | (a) Indicate the study's design with a commonly used term in the title or the abstract                                                                                               | 1             |
|                          |    | (b) Provide in the abstract an informative and balanced summary of what was done and what was found                                                                                  | 2-3           |
| <b>Introduction</b>      |    |                                                                                                                                                                                      |               |
| Background/rationale     | 2  | Explain the scientific background and rationale for the investigation being reported                                                                                                 | 4             |
| Objectives               | 3  | State specific objectives, including any pre-specified hypotheses                                                                                                                    | 4-5           |
| <b>Methods</b>           |    |                                                                                                                                                                                      |               |
| Study design             | 4  | Present key elements of study design early in the paper                                                                                                                              | 5-6           |
| Setting                  | 5  | Describe the setting, locations, and relevant dates, including periods of recruitment, exposure, follow-up, and data collection                                                      | 5-6           |
| Participants             | 6  | (a) Give the eligibility criteria, and the sources and methods of selection of participants                                                                                          | 5-6           |
| Variables                | 7  | Clearly define all outcomes, exposures, predictors, potential confounders, and effect modifiers. Give diagnostic criteria, if applicable                                             | 6-9           |
| Data sources/measurement | 8  | For each variable of interest, give sources of data and details of methods of assessment (measurement). Describe comparability of assessment methods if there is more than one group | 6-9           |
| Bias                     | 9  | Describe any efforts to address potential sources of bias                                                                                                                            | 5-6           |
| Study size               | 10 | Explain how the study size was arrived at                                                                                                                                            | 5-6           |
| Quantitative variables   | 11 | Explain how quantitative variables were handled in the analyses. If applicable, describe which groupings were chosen and why                                                         | 7-9           |
| Statistical methods      | 12 | (a) Describe all statistical methods, including those used to control for confounding                                                                                                | 7-9           |
|                          |    | (b) Describe any methods used to examine subgroups and interactions                                                                                                                  | 7-9           |
|                          |    | (c) Explain how missing data were addressed                                                                                                                                          | 7-9           |
|                          |    | (d) If applicable, describe analytical methods taking account of sampling strategy                                                                                                   | n/a           |
|                          |    | (e) Describe any sensitivity analyses                                                                                                                                                | n/a           |
| <b>Results</b>           |    |                                                                                                                                                                                      |               |
| Participants             | 13 | (a) Report numbers of individuals at each stage of study—eg numbers potentially eligible, examined for eligibility, confirmed                                                        | 10-12         |

|                          |     |                                                                                                                                                                                                              |                |
|--------------------------|-----|--------------------------------------------------------------------------------------------------------------------------------------------------------------------------------------------------------------|----------------|
|                          |     | eligible, included in the study, completing follow-up, and analysed                                                                                                                                          |                |
|                          |     | (b) Give reasons for non-participation at each stage                                                                                                                                                         | 7-9            |
|                          |     | (c) Consider use of a flow diagram                                                                                                                                                                           | n/a            |
| Descriptive data         | 14* | (a) Give characteristics of study participants (eg demographic, clinical, social) and information on exposures and potential confounders                                                                     | 10-12          |
|                          |     | (b) Indicate number of participants with missing data for each variable of interest                                                                                                                          | 10-12          |
| Outcome data             | 15  | Report numbers of outcome events or summary measures                                                                                                                                                         | 10-12          |
| Main results             | 16  | (a) Give unadjusted estimates and, if applicable, confounder-adjusted estimates and their precision (eg, 95% confidence interval). Make clear which confounders were adjusted for and why they were included | 10-12, Table 1 |
|                          |     | (b) Report category boundaries when continuous variables were categorized                                                                                                                                    | Table 1        |
|                          |     | (c) If relevant, consider translating estimates of relative risk into absolute risk for a meaningful time period                                                                                             | n/a            |
| Other analyses           | 17  | Report other analyses done—eg analyses of subgroups and interactions, and sensitivity analyses                                                                                                               | n/a            |
| <b>Discussion</b>        |     |                                                                                                                                                                                                              |                |
| Key results              | 18  | Summarise key results with reference to study objectives                                                                                                                                                     | 12             |
| Limitations              | 19  | Discuss limitations of the study, taking into account sources of potential bias or imprecision. Discuss both direction and magnitude of any potential bias                                                   | 12-13          |
| Interpretation           | 20  | Give a cautious overall interpretation of results considering objectives, limitations, multiplicity of analyses, results from similar studies, and other relevant evidence                                   | 13-15          |
| Generalisability         | 21  | Discuss the generalisability (external validity) of the study results                                                                                                                                        | 13-15          |
| <b>Other information</b> |     |                                                                                                                                                                                                              |                |
| Funding                  | 22  | Give the source of funding and the role of the funders for the present study and, if applicable, for the original study on which the present article is based                                                | 16             |
